# Supplementary material
Source: PubMed Central journal article supplement (PMC6495255)
Supplement: 138386_2_supp_248591_pjjw15.pdf [file 138386_2_supp_248591_pjjw15.pdf]

## Supplemental Material

Table S1. Identified cross-links in rHDL.

| rHDL-2-100 Replicate1   |               |           |           |            |            |          |          |   |          |       |
|-------------------------|---------------|-----------|-----------|------------|------------|----------|----------|---|----------|-------|
| Peptide a               | Peptide b     | CL site a | CL site b | APOA1 Pos1 | APOA1 Pos2 | Mr       | Mz       | z | Id-Score | Type  |
| DYVSQFEGSALGK           | VSFLSALEEYTKK | a7        | b12       | 34         | 238        | 2895.448 | 724.87   | 4 | 28.52    | intra |
| QLNLKLLDNWDSVT<br>STFSK | DYVSQFEGSALGK | a5        | b7        | 45         | 34         | 3589.795 | 1197.606 | 3 | 50       | intra |
| EQLGPVTQEFWDNL<br>EK    | VKDLATVYVDVLK | a15       | b2        | 76         | 12         | 3375.765 | 1126.263 | 3 | 39.32    | intra |
| AKVQPYLDDFQK            | THLAPYSDEL R  | a2        | b8        | 96         | 168        | 2733.376 | 547.683  | 5 | 45.74    | inter |
| AKVQPYLDDFQK            | THLAPYSDEL R  | a2        | b9        | 96         | 169        | 2733.378 | 912.134  | 3 | 45.28    | inter |
| AKVQPYLDDFQKK           | THLAPYSDEL R  | a2        | b8        | 96         | 168        | 2861.473 | 573.302  | 5 | 38.66    | inter |
| AKVQPYLDDFQKK           | LSPLGEEMRDR   | a2        | b6        | 96         | 146        | 2862.474 | 716.626  | 4 | 26.69    | inter |
| KWQEEMEL YR             | AELQEGAR      | a1        | b2        | 107        | 125        | 2265.084 | 567.279  | 4 | 44.26    | inter |
| KWQEEMEL YR             | LSPLGEEMR     | a1        | b7        | 107        | 147        | 2423.163 | 808.729  | 3 | 31.73    | inter |
| QKLHELQEK               | AELQEGAR      | a2        | b2        | 133        | 125        | 2006.054 | 502.521  | 4 | 38.61    | inter |
| QKLHELQEK               | WQEEMEL YR    | a2        | b4        | 133        | 111        | 2416.184 | 605.054  | 4 | 29.17    | inter |
| QKLHELQEK               | WQEEMEL YR    | a2        | b3        | 133        | 110        | 2416.175 | 806.4    | 3 | 26.66    | inter |
| QKLHELQEK               | AELQEGAR      | a2        | b5        | 133        | 128        | 2006.054 | 502.521  | 4 | 37.25    | intra |
| LHELQEKLSPLGEEM<br>R    | AELQEGAR      | a7        | b2        | 140        | 125        | 2762.403 | 553.488  | 5 | 39.51    | inter |

Cross-linking and MS/MS reveals multiple registries in APOA1

|                         |                        |     |     |     |     |          |          |   |       |       |
|-------------------------|------------------------|-----|-----|-----|-----|----------|----------|---|-------|-------|
| LSPLGEEMR               | QKVEPLR                | a7  | b2  | 147 | 118 | 1881.015 | 628.013  | 3 | 32.11 | inter |
| ATEHLSTLSEK             | AKPALEDLR              | a3  | b2  | 198 | 208 | 2208.176 | 553.052  | 4 | 38.75 | intra |
| VSFLSALEEYTK            | AKPALEDLR              | a9  | b2  | 235 | 208 | 2379.269 | 595.825  | 4 | 31.54 | intra |
| rHDL-2-100 Replicate2   |                        |     |     |     |     |          |          |   |       |       |
| VKDLATVYVDVLK           | VSFLSALEEYTK           | a2  | b9  | 12  | 235 | 2829.536 | 944.187  | 3 | 33.53 | intra |
| DLATVYVDVLKDSGR         | LLDNWDSVTSTFSK         | a11 | b3  | 23  | 48  | 3243.635 | 1082.219 | 3 | 25.77 | intra |
| DYVSQFEGSALGK           | VSFLSALEEYTKK          | a7  | b12 | 34  | 238 | 2895.461 | 966.161  | 3 | 33.65 | intra |
| QLNLKLLDNWDSVT<br>STFSK | DYVSQFEGSALGK          | a5  | b7  | 45  | 34  | 3589.812 | 1197.612 | 3 | 34.59 | intra |
| LREQLGPVTQEFWD<br>NLEK  | VKDLATVYVDVLK          | a17 | b2  | 76  | 12  | 3644.945 | 912.244  | 4 | 38.74 | intra |
| AKVQPYLDDFQK            | THLAPYSDELRL           | a2  | b9  | 96  | 169 | 2733.379 | 912.134  | 3 | 33.14 | inter |
| AKVQPYLDDFQK            | THLAPYSDELRL           | a2  | b8  | 96  | 168 | 2733.374 | 684.351  | 4 | 32.96 | inter |
| AKVQPYLDDFQKK           | THLAPYSDELRL           | a2  | b9  | 96  | 169 | 2861.471 | 954.831  | 3 | 32.13 | inter |
| AKVQPYLDDFQK            | LSPLGEEMR              | a2  | b7  | 96  | 147 | 2463.253 | 822.092  | 3 | 28.44 | inter |
| KWQEEMELYL              | AHVDALR                | a1  | b4  | 107 | 157 | 2173.078 | 725.367  | 3 | 33.08 | inter |
| KWQEEMELYL              | AELQEGAR               | a1  | b2  | 107 | 125 | 2265.089 | 1133.552 | 2 | 30.46 | inter |
| KWQEEMELYL              | QKLHELQEK              | a5  | b2  | 111 | 133 | 2544.281 | 637.078  | 4 | 24.64 | inter |
| QKLHELQEK               | AELQEGAR               | a2  | b2  | 133 | 125 | 2006.052 | 669.692  | 3 | 26.15 | inter |
| LHELQEKLSPLGEEM<br>R    | AELQEGAR               | a7  | b2  | 140 | 125 | 2762.406 | 691.609  | 4 | 43.79 | inter |
| LSPLGEEMR               | QKVEPLR                | a7  | b2  | 147 | 118 | 1881.015 | 471.262  | 4 | 29.51 | inter |
| LAEYHAKATEHLSTL<br>SEK  | LREQLGPVTQEFW<br>DNLEK | a7  | b11 | 195 | 70  | 4210.142 | 1053.543 | 4 | 32.97 | inter |

Cross-linking and MS/MS reveals multiple registries in APOA1

| LAEYHAKATEHLSTL<br>SEK | ETEGLR         | a7           | b1           | 195           | 78            | 2712.372 | 679.101  | 4 | 27.28    | inter |
|------------------------|----------------|--------------|--------------|---------------|---------------|----------|----------|---|----------|-------|
| LAEYHAKATEHLSTL<br>SEK | ETEGLR         | a7           | b3           | 195           | 80            | 2712.38  | 905.134  | 3 | 26.2     | inter |
| ATEHLSTLSEK            | AKPALEDLR      | a3           | b2           | 198           | 208           | 2208.175 | 442.643  | 5 | 31.34    | intra |
| QGLLPVLESFK            | AKPALEDLR      | a8           | b2           | 223           | 208           | 2223.269 | 556.825  | 4 | 29.55    | intra |
| VSFLSALEEYTKKLN<br>TQ  | ATEHLSTLSEK    | a13          | b3           | 239           | 198           | 3166.622 | 634.332  | 5 | 21.59    | intra |
| rHDL-2-100 Replicate3  |                |              |              |               |               |          |          |   |          |       |
| Peptide a              | Peptide b      | CL<br>site a | CL<br>site b | APOA1<br>Pos1 | APOA1<br>Pos2 | Mr       | Mz       | z | Id-Score | Type  |
| VKDLATVYVDVLK          | ETEGLR         | a2           | b1           | 12            | 78            | 2147.203 | 716.742  | 3 | 36.51    | intra |
| VKDLATVYVDVLKDS<br>GR  | LLDNWDSVTSTFSK | a13          | b3           | 23            | 48            | 3470.814 | 868.711  | 4 | 33.47    | intra |
| DLATVYVDVLKDSGR        | LLDNWDSVTSTFSK | a11          | b3           | 23            | 48            | 3243.643 | 1082.222 | 3 | 34.8     | intra |
| DYVSQFEGSALGK          | VSFLSALEEYTKK  | a7           | b12          | 34            | 238           | 2895.464 | 966.163  | 3 | 32.22    | intra |
| AKVQPYLDDFQKK          | THLAPYSDELRL   | a2           | b8           | 96            | 168           | 2861.491 | 716.38   | 4 | 34.48    | inter |
| AKVQPYLDDFQKK          | LSPLGEEMR      | a2           | b7           | 96            | 147           | 2591.354 | 648.846  | 4 | 21.53    | inter |
| AKVQPYLDDFQKK          | LSPLGEEMR      | a2           | b6           | 96            | 146           | 2591.354 | 648.846  | 4 | 20.15    | inter |
| KWQEEMELYSR            | AELQEGAR       | a1           | b2           | 107           | 125           | 2265.093 | 567.281  | 4 | 58.21    | inter |
| KWQEEMELYSR            | QKLHELQEK      | a4           | b2           | 110           | 133           | 2544.285 | 509.865  | 5 | 30.66    | inter |
| KWQEEMELYSR            | QKLHELQEK      | a5           | b2           | 111           | 133           | 2544.291 | 509.866  | 5 | 32.08    | inter |
| QKLHELQEKLSPLGE<br>EMR | AELQEGAR       | a9           | b2           | 140           | 125           | 3018.569 | 755.65   | 4 | 29.01    | inter |

Cross-linking and MS/MS reveals multiple registries in APOA1

| LSPLGEEMR                    | QKVEPLR        | a6           | b2           | 146           | 118           | 1881.026 | 471.264  | 4 | 28.49    | inter |
|------------------------------|----------------|--------------|--------------|---------------|---------------|----------|----------|---|----------|-------|
| LAEYHAKATEHLSTL<br>SEK       | ETEGLR         | a7           | b1           | 195           | 78            | 2712.39  | 453.073  | 6 | 31.6     | inter |
| QGLLPVLESFKVSFL<br>SALEEYTKK | AKPALEDLR      | a8           | b2           | 223           | 208           | 3719.047 | 620.849  | 6 | 24.79    | intra |
| QGLLPVLESFKVSFL<br>SALEEYTK  | DYVSQFEGSALGK  | a11          | b7           | 226           | 34            | 3979.085 | 995.779  | 4 | 23.88    | intra |
| rHDL-2-100 Replicate4        |                |              |              |               |               |          |          |   |          |       |
| Peptide a                    | Peptide b      | CL<br>site a | CL<br>site b | APOA1<br>Pos1 | APOA1<br>Pos2 | Mr       | Mz       | z | Id-Score | Type  |
| DLATVYVDVLKDSGR              | LLDNWDSVTSTFSK | a11          | b3           | 23            | 48            | 3243.64  | 1082.221 | 3 | 40.67    | intra |
| QLNLKLLDNWDSVT<br>STFSK      | DYVSQFEGSALGK  | a5           | b7           | 45            | 34            | 3589.809 | 1197.611 | 3 | 37.87    | intra |
| EQLGPVTQEFWDNL<br>EK         | VKDLATVYVDVLK  | a15          | b2           | 76            | 12            | 3375.775 | 1126.266 | 3 | 26.86    | intra |
| AKVQPYLDDFQK                 | THLAPYSDELRL   | a2           | b9           | 96            | 169           | 2733.386 | 684.354  | 4 | 40.36    | inter |
| AKVQPYLDDFQK                 | THLAPYSDELRL   | a2           | b8           | 96            | 168           | 2733.389 | 684.355  | 4 | 40.46    | inter |
| AKVQPYLDDFQK                 | LSPLGEEMR      | a2           | b6           | 96            | 146           | 2463.253 | 616.821  | 4 | 31.17    | inter |
| KWQEEMELYLRL                 | AHVDALRL       | a1           | b4           | 107           | 157           | 2173.078 | 725.367  | 3 | 41.38    | inter |
| QKVEPLRAELQEGAR              | KWQEEMELYLRL   | a9           | b1           | 125           | 107           | 3115.569 | 779.9    | 4 | 23.11    | inter |
| QKLHELQEK                    | AELQEGAR       | a2           | b2           | 133           | 125           | 2006.062 | 402.22   | 5 | 31.66    | inter |
| QKLHELQEK                    | WQEEMELYLRL    | a2           | b3           | 133           | 110           | 2416.188 | 484.245  | 5 | 27.88    | inter |

Cross-linking and MS/MS reveals multiple registries in APOA1

| LHELQEKLSPLGEEM RDR      | AELQEGAR          | a7        | b2        | 140        | 125        | 3033.541 | 607.716  | 5 | 35.07    | inter |
|--------------------------|-------------------|-----------|-----------|------------|------------|----------|----------|---|----------|-------|
| LSPLGEEMR                | QKVEPLR           | a7        | b2        | 147        | 118        | 1881.022 | 471.263  | 4 | 31.68    | inter |
| LAEYHAKATEHLSTL SEK      | ETEGLR            | a7        | b3        | 195        | 80         | 2712.376 | 543.483  | 5 | 27.16    | inter |
| LAEYHAKATEHLSTL SEK      | EQLGPVTQEFWDN LEK | a7        | b9        | 195        | 70         | 3940.965 | 986.249  | 4 | 26.2     | inter |
| ATEHLSTLSEK              | AKPALEDLR         | a3        | b2        | 198        | 208        | 2208.179 | 737.068  | 3 | 41.57    | intra |
| QGLLPVLESFKVSFL SALEEYTK | ATEHLSTLSEK       | a11       | b10       | 226        | 205        | 3794.04  | 759.816  | 5 | 30.36    | intra |
| rHDL-2-80 replicate 1    |                   |           |           |            |            |          |          |   |          |       |
| Peptide a                | Peptide b         | CL site a | CL site b | APOA1 Pos1 | APOA1 Pos2 | Mr       | Mz       | z | Id-Score | Type  |
| DLATVYVDVLKDSGR          | DYVSQFEGSALGK     | a11       | b7        | 23         | 34         | 3031.512 | 1011.512 | 3 | 40.16    | intra |
| DLATVYVDVLKDSGR          | DYVSQFEGSALGK     | a11       | b1        | 23         | 28         | 3031.517 | 758.887  | 4 | 38.41    | intra |
| DYVSQFEGSALGKQ LNLK      | VSFLSALEEYTK      | a13       | b8        | 40         | 234        | 3363.733 | 1122.252 | 3 | 42.41    | intra |
| EQLGPVTQEFWDNL EK        | VKDLATVYVDVLK     | a12       | b2        | 73         | 12         | 3375.784 | 844.954  | 4 | 28.32    | intra |
| AKVQPYLDDFQK             | THLAPYSDEL R      | a2        | b9        | 96         | 169        | 2733.38  | 912.135  | 3 | 45.81    | inter |
| AKVQPYLDDFQK             | THLAPYSDEL R      | a2        | b8        | 96         | 168        | 2733.379 | 547.684  | 5 | 45.18    | inter |
| AKVQPYLDDFQKK            | DLEEVK            | a2        | b3        | 96         | 91         | 2292.195 | 574.057  | 4 | 33.74    | intra |
| AKVQPYLDDFQK             | LSPLGEEMR         | a2        | b7        | 96         | 147        | 2463.245 | 822.089  | 3 | 32.3     | inter |
| KWQEEMEL YR              | AELQEGAR          | a1        | b2        | 107        | 125        | 2265.088 | 567.28   | 4 | 45.19    | inter |
| KWQEEMEL YR              | LSPLGEEMR         | a1        | b7        | 107        | 147        | 2423.168 | 808.731  | 3 | 31.61    | inter |
| QKLHELQEK                | DLEEVK            | a2        | b1        | 133        | 89         | 1864.991 | 622.671  | 3 | 34.19    | intra |
| QKLHELQEK                | WQEEMEL YR        | a2        | b4        | 133        | 111        | 2416.185 | 484.245  | 5 | 32.54    | inter |
| LHELQEK                  | QKVEPLR           | a6        | b2        | 139        | 118        | 1745.978 | 437.502  | 4 | 30.01    | intra |

Cross-linking and MS/MS reveals multiple registries in APOA1

| LHELQEKLSPLGEEM R        | AELQEGAR          | a7        | b2        | 140        | 125        | 2762.405 | 691.609  | 4 | 40.2     | inter |
|--------------------------|-------------------|-----------|-----------|------------|------------|----------|----------|---|----------|-------|
| LHELQEKLSPLGEEM RDR      | AELQEGAR          | a7        | b2        | 140        | 125        | 3033.531 | 759.39   | 4 | 29.31    | inter |
| LSPLGEEMR                | QKVEPLR           | a7        | b2        | 147        | 118        | 1881.015 | 628.013  | 3 | 32.85    | inter |
| LAEYHAKATEHLSTL SEK      | ETEGLR            | a7        | b1        | 195        | 78         | 2712.374 | 679.101  | 4 | 33.28    | inter |
| LAEYHAKATEHLSTL SEK      | EQLGPVTQEFWDN LEK | a7        | b9        | 195        | 70         | 3940.955 | 657.834  | 6 | 30.11    | inter |
| QGLLPVLESFKVSFL SALEEYTK | ATEHLSTLSEK       | a11       | b3        | 226        | 198        | 3794.022 | 759.812  | 5 | 34.81    | intra |
| QGLLPVLESFKVSFL SALEEYTK | AKPALEDLR         | a11       | b7        | 226        | 213        | 3590.982 | 898.753  | 4 | 28.7     | intra |
| VSFLSALEEYTK             | AKPALEDLR         | a9        | b2        | 235        | 208        | 2379.271 | 595.826  | 4 | 33.08    | intra |
| rHDL-2-80 replicate 2    |                   |           |           |            |            |          |          |   |          |       |
| Peptide a                | Peptide b         | CL site a | CL site b | APOA1 Pos1 | APOA1 Pos2 | Mr       | Mz       | z | Id-Score | Type  |
| VKDLATVYVDVLK            | ETEGLR            | a2        | b1        | 12         | 78         | 2147.185 | 716.736  | 3 | 34.42    | intra |
| VKDLATVYVDVLK            | ETEGLR            | a2        | b3        | 12         | 80         | 2147.185 | 537.804  | 4 | 31.59    | intra |
| VKDLATVYVDVLKDS GR       | DYVSQFEGSALGK GR  | a13       | b1        | 23         | 28         | 3258.679 | 815.678  | 4 | 50.44    | intra |
| DLATVYVDVLKDSGR          | LLDNWDSVTSTFSK    | a11       | b6        | 23         | 51         | 3243.631 | 1082.218 | 3 | 38.95    | intra |
| DLATVYVDVLKDSGR          | DYVSQFEGSALGK     | a11       | b1        | 23         | 28         | 3031.517 | 758.887  | 4 | 38.41    | intra |
| QLNLKLLDNWDSVT STFSK     | DYVSQFEGSALGK     | a5        | b7        | 45         | 34         | 3589.799 | 1197.607 | 3 | 52.67    | intra |
| AKVQPYLDDFQKK            | THLAPYSDEL R      | a2        | b8        | 96         | 168        | 2861.473 | 716.376  | 4 | 39.5     | inter |
| AKVQPYLDDFQKK            | THLAPYSDEL R      | a2        | b9        | 96         | 169        | 2861.477 | 716.377  | 4 | 33.64    | inter |
| AKVQPYLDDFQK             | LSPLGEEMR         | a2        | b6        | 96         | 146        | 2463.246 | 822.09   | 3 | 31.34    | inter |
| AKVQPYLDDFQKK            | LSPLGEEMRDR       | a2        | b6        | 96         | 146        | 2862.475 | 573.503  | 5 | 25.01    | inter |
| KWQEEMEL YR              | VQPYLDDFQK        | a1        | b6        | 107        | 102        | 2644.263 | 662.074  | 4 | 38.05    | intra |
| KWQEEMEL YR              | LSPLGEEMR         | a1        | b6        | 107        | 146        | 2423.164 | 606.799  | 4 | 34       | inter |
| QKVEPLRAELQEGA R         | LSPLGEEMR         | a2        | b7        | 118        | 147        | 2735.433 | 684.866  | 4 | 28.65    | inter |

Cross-linking and MS/MS reveals multiple registries in APOA1

|                              |                        |              |              |               |               |          |          |   |          |       |
|------------------------------|------------------------|--------------|--------------|---------------|---------------|----------|----------|---|----------|-------|
| QKLHELQEK                    | AELQEGAR               | a2           | b2           | 133           | 125           | 2006.055 | 502.522  | 4 | 37.16    | inter |
| QKLHELQEK                    | AELQEGAR               | a2           | b5           | 133           | 128           | 2006.056 | 502.522  | 4 | 36.75    | intra |
| QKLHELQEK                    | WQEEMELYR              | a2           | b3           | 133           | 110           | 2416.191 | 605.055  | 4 | 32.66    | inter |
| QKLHELQEKLSPLGE<br>EMR       | AELQEGAR               | a9           | b2           | 140           | 125           | 3018.558 | 755.647  | 4 | 31.69    | inter |
| LAEYHAKATEHLSTL<br>SEK       | ETEGLR                 | a7           | b3           | 195           | 80            | 2712.376 | 543.483  | 5 | 33.5     | inter |
| LAEYHAKATEHLSTL<br>SEK       | LREQLGPVTQEFW<br>DNLEK | a7           | b14          | 195           | 73            | 4210.128 | 843.033  | 5 | 30.92    | inter |
| ATEHLSTLSEK                  | AKPALEDLR              | a10          | b2           | 205           | 208           | 2208.177 | 737.067  | 3 | 40.78    | intra |
| ATEHLSTLSEKAKPA<br>LEDLR     | AKPALEDLR              | a11          | b7           | 206           | 213           | 3201.739 | 1068.254 | 3 | 27.44    | intra |
| AKPALEDLR                    | LAEYHAK                | a2           | b3           | 208           | 191           | 1823.989 | 457.005  | 4 | 36.98    | intra |
| QGLLPVLESFKVSFL<br>SALEEYTK  | ATEHLSTLSEK            | a11          | b10          | 226           | 205           | 3794.029 | 759.814  | 5 | 34.37    | intra |
| VSFLSALEEYTK                 | AKPALEDLR              | a8           | b2           | 234           | 208           | 2379.279 | 794.101  | 3 | 37.6     | intra |
| rHDL-2-120 replicate 1       |                        |              |              |               |               |          |          |   |          |       |
| Peptide a                    | Peptide b              | CL<br>site a | CL<br>site b | APOA1<br>Pos1 | APOA1<br>Pos2 | Mr       | Mz       | z | Id-Score | Type  |
| DYVSQFEGSALGK                | QKLHELQEK              | a1           | b2           | 28            | 133           | 2533.274 | 845.433  | 3 | 31.86    | intra |
| QLNLKLLDNWDSVT<br>STFSK      | DYVSQFEGSALGK          | a5           | b7           | 45            | 34            | 3589.79  | 898.455  | 4 | 29.44    | intra |
| LREQLGPVTQEFWD<br>NLEKETEGLR | QEMSKDLEEVK            | a21          | b5           | 80            | 88            | 4203.072 | 701.52   | 6 | 32.83    | intra |
| AKVQPYLDDFQK                 | THLAPYSDELRL           | a2           | b9           | 96            | 169           | 2733.37  | 547.682  | 5 | 47.65    | inter |
| AKVQPYLDDFQK                 | THLAPYSDELRL           | a2           | b8           | 96            | 168           | 2733.367 | 684.349  | 4 | 39.57    | inter |
| AKVQPYLDDFQK                 | DLEEVK                 | a2           | b3           | 96            | 91            | 2164.103 | 542.034  | 4 | 37.96    | intra |
| AKVQPYLDDFQKK                | LSPLGEEMRDR            | a2           | b6           | 96            | 146           | 2862.471 | 573.502  | 5 | 26.32    | inter |

Cross-linking and MS/MS reveals multiple registries in APOA1

| KWQEEMELYSR                  | AELQEGAR     | a1           | b2           | 107           | 125           | 2265.079 | 567.278  | 4 | 39.87    | inter |
|------------------------------|--------------|--------------|--------------|---------------|---------------|----------|----------|---|----------|-------|
| WQEEMELYSR                   | QKVEPLR      | a6           | b2           | 113           | 118           | 2133.063 | 534.274  | 4 | 32.41    | intra |
| QKVEPLRAELQEGAR              | LSPLGEEMR    | a2           | b7           | 118           | 147           | 2735.436 | 684.867  | 4 | 27.36    | inter |
| AELQEGAR                     | QKVEPLR      | a2           | b2           | 125           | 118           | 1722.935 | 575.319  | 3 | 32.27    | intra |
| QKLHELQEK                    | AELQEGAR     | a2           | b5           | 133           | 128           | 2006.049 | 402.218  | 5 | 38.34    | intra |
| QKLHELQEK                    | AELQEGAR     | a2           | b2           | 133           | 125           | 2006.05  | 502.52   | 4 | 36.09    | inter |
| LHELQEK                      | QKVEPLR      | a6           | b2           | 139           | 118           | 1745.977 | 873.996  | 2 | 29.44    | intra |
| LHELQEKLSPLGEEMR             | AELQEGAR     | a7           | b2           | 140           | 125           | 2762.4   | 691.608  | 4 | 39.64    | inter |
| LSPLGEEMR                    | QKLHELQEK    | a7           | b2           | 147           | 133           | 2164.126 | 722.383  | 3 | 29.19    | intra |
| LSPLGEEMR                    | QKVEPLR      | a7           | b2           | 147           | 118           | 1881.009 | 471.26   | 4 | 29.19    | inter |
| LEALKENGGAR                  | LAEYHAK      | a5           | b3           | 182           | 191           | 1969.034 | 657.353  | 3 | 30.72    | intra |
| ATEHLSTLSEK                  | AKPALEDLR    | a3           | b2           | 198           | 208           | 2208.168 | 553.05   | 4 | 35.82    | intra |
| ATEHLSTLSEK                  | LEALKENGGAR  | a3           | b5           | 198           | 182           | 2353.227 | 589.314  | 4 | 24.55    | intra |
| rHDL-2-120 replicate 2       |              |              |              |               |               |          |          |   |          |       |
| Peptide a                    | Peptide b    | CL<br>site a | CL<br>site b | APOA1<br>Pos1 | APOA1<br>Pos2 | Mr       | Mz       | z | Id-Score | Type  |
| DYVSQFEGSALGK                | QKLHELQEK    | a1           | b2           | 28            | 133           | 2533.276 | 845.433  | 3 | 37.17    | intra |
| LREQLGPVTQEFWD<br>NLEKETEGLR | QEMSKDLEEVK  | a19          | b5           | 78            | 88            | 4203.081 | 1051.778 | 4 | 23.58    | intra |
| LREQLGPVTQEFWD<br>NLEKETEGLR | QEMSKDLEEVK  | a21          | b5           | 80            | 88            | 4203.081 | 701.521  | 6 | 31.12    | intra |
| AKVQPYLDDFQK                 | THLAPYSDELRL | a2           | b9           | 96            | 169           | 2733.372 | 912.132  | 3 | 44.9     | inter |



Cross-linking and MS/MS reveals multiple registries in APOA1

|                             |              |     |    |     |     |          |         |   |       |       |
|-----------------------------|--------------|-----|----|-----|-----|----------|---------|---|-------|-------|
| AKVQPYLDDFQKK               | LSPLGEEMRDR  | a2  | b6 | 96  | 146 | 2862.468 | 716.625 | 4 | 23.78 | inter |
| QKVEPLRAELQEGAR             | LSPLGEEMR    | a2  | b6 | 118 | 146 | 2735.438 | 548.095 | 5 | 22.46 | inter |
| AELQEGAR                    | QKVEPLR      | a2  | b2 | 125 | 118 | 1722.935 | 575.32  | 3 | 35.61 | intra |
| QKLHELQEK                   | AELQEGAR     | a2  | b2 | 133 | 125 | 2006.052 | 502.521 | 4 | 40.96 | inter |
| QKLHELQEK                   | AELQEGAR     | a2  | b5 | 133 | 128 | 2006.05  | 669.691 | 3 | 34.95 | intra |
| QKLHELQEK                   | WQEEMELR     | a2  | b3 | 133 | 110 | 2416.18  | 605.053 | 4 | 22.14 | intra |
| LHELQEK                     | QKVEPLR      | a6  | b2 | 139 | 118 | 1745.977 | 583     | 3 | 34.91 | intra |
| LHELQEKLSPLGEEMR            | AELQEGAR     | a7  | b2 | 140 | 125 | 2762.395 | 691.607 | 4 | 39.75 | inter |
| LSPLGEEMR                   | QKLHELQEK    | a7  | b2 | 147 | 133 | 2164.127 | 722.384 | 3 | 31.2  | intra |
| LAARLEALKENGGAR             | THLAPYSDELRR | a9  | b9 | 182 | 169 | 3134.666 | 627.941 | 5 | 25.39 | intra |
| ATEHLSTLSEK                 | LEALKENGGAR  | a3  | b5 | 198 | 182 | 2353.223 | 589.314 | 4 | 24.95 | intra |
| ATEHLSTLSEK                 | AKPALEDLR    | a10 | b2 | 205 | 208 | 2208.171 | 553.05  | 4 | 35.08 | intra |
| QGLLPVLESFKVSFL<br>SALEEYTK | AKPALEDLR    | a11 | b7 | 226 | 213 | 3590.979 | 898.753 | 4 | 24.76 | intra |

**Table S2. Identified cross-links in human HDL**

| Replicate 1         |                  |           |           |            |            |          |          |   |          |
|---------------------|------------------|-----------|-----------|------------|------------|----------|----------|---|----------|
| Peptide a           | Peptide b        | CL site a | CL site b | APOA1 Pos1 | APOA1 Pos2 | Mr       | Mz       | z | Id-Score |
| VKDLATVYVDVLKDSGR   | DYVSQFEGSALGK    | a13       | b1        | 23         | 28         | 3258.677 | 815.677  | 4 | 40.89    |
| DLATVYVDVLKDSGR     | DYVSQFEGSALGK    | a11       | b1        | 23         | 28         | 3031.519 | 1011.514 | 3 | 26.78    |
| QLNLKLLDNWDSVTSTFSK | DYVSQFEGSALGK    | a5        | b7        | 45         | 34         | 3589.808 | 1197.61  | 3 | 40.46    |
| QLNLKLLDNWDSVTSTFSK | EQLGPVTQEFWDNLEK | a5        | b1        | 45         | 62         | 4122.043 | 1031.519 | 4 | 37.9     |
| LLDNWDSVTSTFSKLR    | AELQEGAR         | a14       | b2        | 59         | 125        | 2735.395 | 684.857  | 4 | 29.79    |
| LLDNWDSVTSTFSKLR    | AKPALEDLR        | a14       | b6        | 59         | 212        | 2874.527 | 575.913  | 5 | 22.6     |
| LREQLGPTQEFWDNLEK   | VKDLATVYVDVLK    | a17       | b2        | 76         | 12         | 3644.946 | 912.244  | 4 | 29.42    |
| AKVQPYLDDFQKK       | THLAPYSDELRL     | a2        | b9        | 96         | 169        | 2861.474 | 573.303  | 5 | 51.3     |
| AKVQPYLDDFQKK       | THLAPYSDELRL     | a2        | b8        | 96         | 168        | 2861.465 | 573.301  | 5 | 49.63    |
| AKVQPYLDDFQK        | AELQEGAR         | a2        | b2        | 96         | 125        | 2305.17  | 577.3    | 4 | 45.08    |
| AKVQPYLDDFQKK       | DLEEVK           | a2        | b3        | 96         | 91         | 2292.201 | 574.058  | 4 | 41.05    |
| AKVQPYLDDFQK        | VSFLSALEEYTK     | a2        | b8        | 96         | 234        | 2818.44  | 705.618  | 4 | 37.7     |
| AKVQPYLDDFQKK       | LSPLGEEMRDR      | a2        | b6        | 96         | 146        | 2862.476 | 573.503  | 5 | 31.99    |
| AKVQPYLDDFQK        | VSFLSALEEYTK     | a2        | b9        | 96         | 235        | 2818.443 | 705.619  | 4 | 30.07    |
| VQPYLDDFQK          | QKVEPLR          | a7        | b2        | 103        | 118        | 2102.115 | 526.537  | 4 | 20.88    |
| VQPYLDDFQKK         | DLEEVK           | a10       | b4        | 106        | 92         | 2093.069 | 524.275  | 4 | 27.98    |
| KWQEEMELYL          | QKLHELQEK        | a4        | b2        | 110        | 133        | 2544.255 | 637.071  | 4 | 23.69    |
| KWQEEMELYL          | QKLHELQEK        | a4        | b2        | 110        | 133        | 2544.285 | 509.865  | 5 | 23.44    |
| QKVEPLR             | ETEGLR           | a2        | b1        | 118        | 78         | 1553.854 | 518.959  | 3 | 23.95    |
| QKLHELQEK           | AELQEGAR         | a2        | b2        | 133        | 125        | 2006.058 | 402.219  | 5 | 36.55    |
| LHELQEKLSPLGEEMR    | AELQEGAR         | a7        | b2        | 140        | 125        | 2762.403 | 921.809  | 3 | 43.44    |
| LSPLGEEMR           | QKVEPLR          | a6        | b2        | 146        | 118        | 1881.024 | 471.264  | 4 | 22.15    |
| LSPLGEEMR           | QKVEPLR          | a7        | b2        | 147        | 118        | 1881.015 | 471.262  | 4 | 27.32    |
| LEALKENGGAR         | LAEYHAK          | a5        | b3        | 182        | 191        | 1969.04  | 493.268  | 4 | 33.6     |

Cross-linking and MS/MS reveals multiple registries in APOA1

| LAELYHAKATEHLSTLSEK | LREQLGPVTQEFWDN<br>LEK | a7           | b11          | 195           | 70            | 4210.135 | 843.035  | 5 | 36.93        |
|---------------------|------------------------|--------------|--------------|---------------|---------------|----------|----------|---|--------------|
| LAELYHAKATEHLSTLSEK | ETEGLR                 | a7           | b3           | 195           | 80            | 2712.372 | 453.07   | 6 | 33.18        |
| LAELYHAKATEHLSTLSEK | DLEEVK                 | a7           | b4           | 195           | 92            | 2740.41  | 549.09   | 5 | 22.12        |
| ATEHLSTLSEK         | AKPALEDLR              | a3           | b2           | 198           | 208           | 2208.176 | 737.066  | 3 | 36.58        |
| ATEHLSTLSEK         | AKPALEDLR              | a10          | b2           | 205           | 208           | 2208.173 | 737.065  | 3 | 32.64        |
| AKPALEDLR           | ETEGLR                 | a2           | b1           | 208           | 78            | 1696.911 | 566.645  | 3 | 33.16        |
| AKPALEDLR           | AKPALEDLR              | a2           | b7           | 208           | 213           | 2005.142 | 402.036  | 5 | 32.29        |
| AKPALEDLR           | QKLHELQEK              | a7           | b2           | 213           | 133           | 2145.199 | 430.048  | 5 | 24.39        |
| VSFLSALEEYTK        | LEALKENGGAR            | a8           | b5           | 234           | 182           | 2524.325 | 842.45   | 3 | 38.25        |
| VSFLSALEEYTK        | AKPALEDLR              | a8           | b2           | 234           | 208           | 2379.269 | 595.825  | 4 | 34.51        |
| VSFLSALEEYTKK       | VSFLSALEEYTK           | a12          | b8           | 238           | 234           | 2881.512 | 721.386  | 4 | 22.25        |
| Replicate 2         |                        |              |              |               |               |          |          |   |              |
| Peptide a           | Peptide b              | CL<br>site a | CL<br>site b | APOA1<br>Pos1 | APOA1<br>Pos2 | Mr       | Mz       | z | Id-<br>Score |
| DLATVYVDVLKDSGR     | DYVSQFEGSALGK          | a11          | b1           | 23            | 28            | 3031.508 | 1011.514 | 3 | 26.78        |
| DYVSQFEGSALGKQLNLK  | LLDNWDSVTSTFSK         | a13          | b3           | 40            | 48            | 3589.792 | 898.456  | 4 | 26.9         |
| QLNLKLLDNWDSVTSTFSK | DYVSQFEGSALGK          | a5           | b7           | 45            | 34            | 3589.803 | 1197.609 | 3 | 48.64        |
| LLDNWDSVTSTFSKLR    | AELQEGAR               | a14          | b2           | 59            | 125           | 2735.391 | 912.805  | 3 | 30.22        |
| LLDNWDSVTSTFSKLR    | AELQEGAR               | a14          | b5           | 59            | 128           | 2735.401 | 912.808  | 3 | 21.69        |
| LLDNWDSVTSTFSKLR    | AKPALEDLR              | a14          | b7           | 59            | 213           | 2874.526 | 575.913  | 5 | 25.57        |
| AELQEGAR            | DLEEVKAK               | a2           | b6           | 94            | 125           | 1784.93  | 595.984  | 3 | 37.77        |
| DYVSQFEGSALGK       | AKVQPYLDDFQK           | a1           | b2           | 96            | 28            | 2832.405 | 945.143  | 3 | 31           |
| AKVQPYLDDFQKK       | DLEEVK                 | a2           | b3           | 96            | 91            | 2292.198 | 459.447  | 5 | 40.54        |
| AKVQPYLDDFQK        | LSPLGEEMR              | a2           | b7           | 96            | 147           | 2463.247 | 616.82   | 4 | 23.53        |
| AKVQPYLDDFQKK       | THLAPYSDELRL           | a2           | b8           | 96            | 168           | 2861.476 | 477.92   | 6 | 41.55        |
| AKVQPYLDDFQK        | THLAPYSDELRL           | a2           | b9           | 96            | 169           | 2733.374 | 684.351  | 4 | 41.53        |

Cross-linking and MS/MS reveals multiple registries in APOA1

|                      |                        |     |     |     |     |          |          |   |       |
|----------------------|------------------------|-----|-----|-----|-----|----------|----------|---|-------|
| AKVQPYLDDFQK         | ATEHLSTLSEK            | a2  | b3  | 96  | 198 | 2647.349 | 662.845  | 4 | 31.48 |
| AKVQPYLDDFQK         | ATEHLSTLSEK            | a2  | b10 | 96  | 205 | 2647.354 | 662.846  | 4 | 32.65 |
| AKVQPYLDDFQK         | VSFLSALEEYTK           | a2  | b8  | 96  | 234 | 2818.446 | 940.49   | 3 | 36.3  |
| VQPYLDDFQKK          | DLEEVK                 | a10 | b4  | 106 | 92  | 2093.075 | 524.276  | 4 | 28.21 |
| VQPYLDDFQK           | QKVEPLR                | a6  | b2  | 118 | 102 | 2102.121 | 526.538  | 4 | 20.88 |
| EQLGPVTQEFWDNLEK     | QKVEPLR                | a9  | b2  | 118 | 70  | 2782.429 | 928.484  | 3 | 24.9  |
| LSPLGEEMR            | QKVEPLR                | a7  | b2  | 118 | 147 | 1881.017 | 628.013  | 3 | 28.27 |
| QKLHELQEK            | WQEEMELR               | a2  | b6  | 133 | 113 | 2416.169 | 605.05   | 4 | 20.41 |
| QKLHELQEKLSPLGEEMR   | AELQEGAR               | a9  | b2  | 140 | 125 | 3018.564 | 604.721  | 5 | 42.25 |
| VSFLSALEEYTK         | LEALKENGGAR            | a8  | b5  | 182 | 234 | 2524.335 | 842.453  | 3 | 39.14 |
| LEALKENGGAR          | LAEYHAK                | a5  | b3  | 182 | 191 | 1969.039 | 657.354  | 3 | 33.62 |
| LAEYHAKATEHLSTLSEK   | DYVSQFEGSALGK          | a7  | b1  | 195 | 28  | 3408.692 | 853.181  | 4 | 29.8  |
| LAEYHAKATEHLSTLSEK   | LREQLGPVTQEFWDN<br>LEK | a7  | b11 | 195 | 70  | 4210.159 | 1053.548 | 4 | 32.58 |
| LAEYHAKATEHLSTLSEK   | DLEEVK                 | a7  | b4  | 195 | 92  | 2740.397 | 549.087  | 5 | 24.11 |
| ATEHLSTLSEKAKPALEDLR | THLAPYSDELRL           | a11 | b8  | 206 | 168 | 3490.814 | 873.711  | 4 | 25.62 |
| ATEHLSTLSEK          | AKPALEDLR              | a3  | b2  | 208 | 198 | 2208.178 | 442.643  | 5 | 34.46 |
| QGLLPVLESFK          | AKPALEDLR              | a8  | b2  | 208 | 223 | 2223.263 | 556.824  | 4 | 29.68 |
| VSFLSALEEYTK         | AKPALEDLR              | a8  | b2  | 208 | 234 | 2379.272 | 595.826  | 4 | 38.02 |
| LREQLGPVTQEFWDNLEK   | AKPALEDLR              | a11 | b2  | 208 | 70  | 3194.678 | 799.677  | 4 | 30.28 |
| ATEHLSTLSEKAKPALEDLR | EQLGPVTQEFWDNLE<br>K   | a13 | b9  | 208 | 70  | 4122.086 | 1031.529 | 4 | 24.13 |
| AKPALEDLR            | ETEGLR                 | a2  | b1  | 208 | 78  | 1696.913 | 425.236  | 4 | 40.04 |
| AKPALEDLR            | AKPALEDLR              | a2  | b6  | 208 | 212 | 2005.137 | 502.292  | 4 | 38.53 |

Cross-linking and MS/MS reveals multiple registries in APOA1

|               |              |     |    |     |     |          |         |   |       |
|---------------|--------------|-----|----|-----|-----|----------|---------|---|-------|
| VSFLSALEEYTKK | ATEHLSTLSEK  | a12 | b3 | 238 | 198 | 2710.413 | 543.09  | 5 | 25.66 |
| VSFLSALEEYTKK | VSFLSALEEYTK | a12 | b8 | 238 | 234 | 2881.51  | 961.511 | 3 | 34.96 |

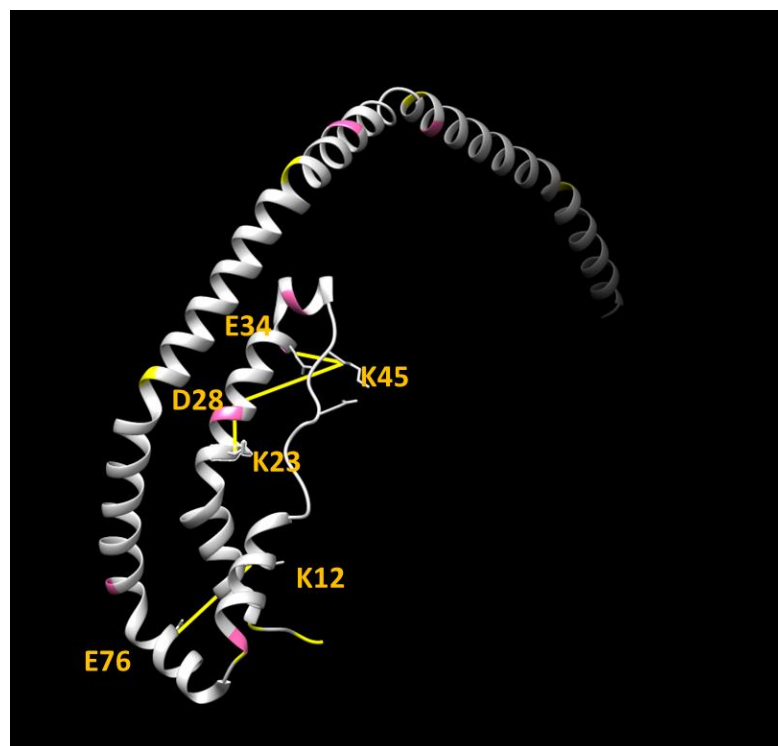

Figure S1. N-terminal cross-links (rHDL) on the crystal structure of N-terminal truncated APOA1 (PDB ID: 3R2P).

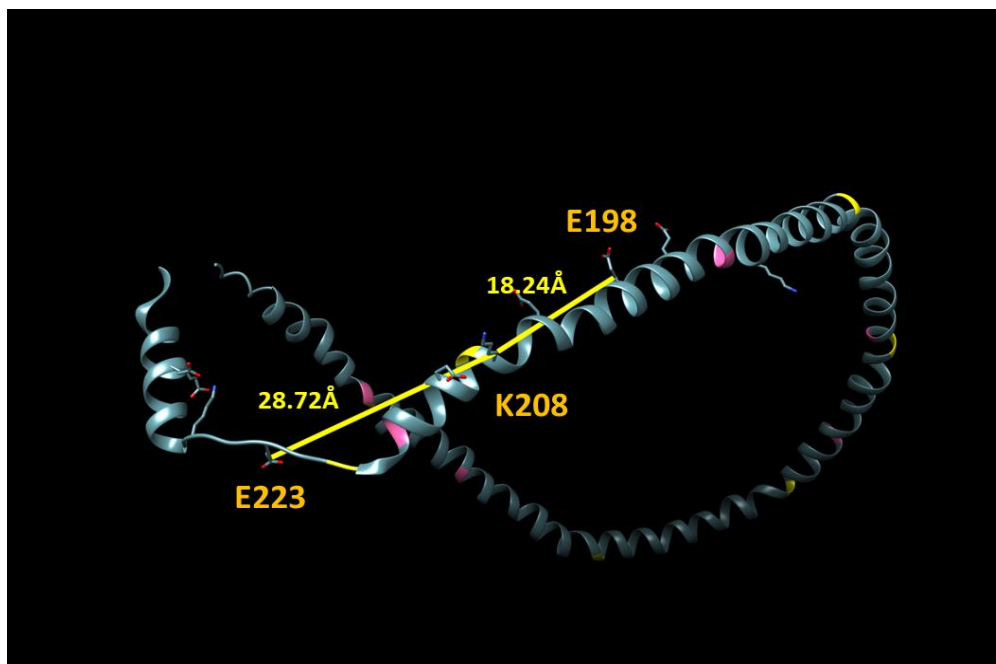

**Figure S2. Distances of C-terminal cross-links detected in rHDL based on the crystal structure of N-terminal truncated APOA1 (PDB ID:1AV1).**

Cross-linking and MS/MS reveals multiple registries in APOA1

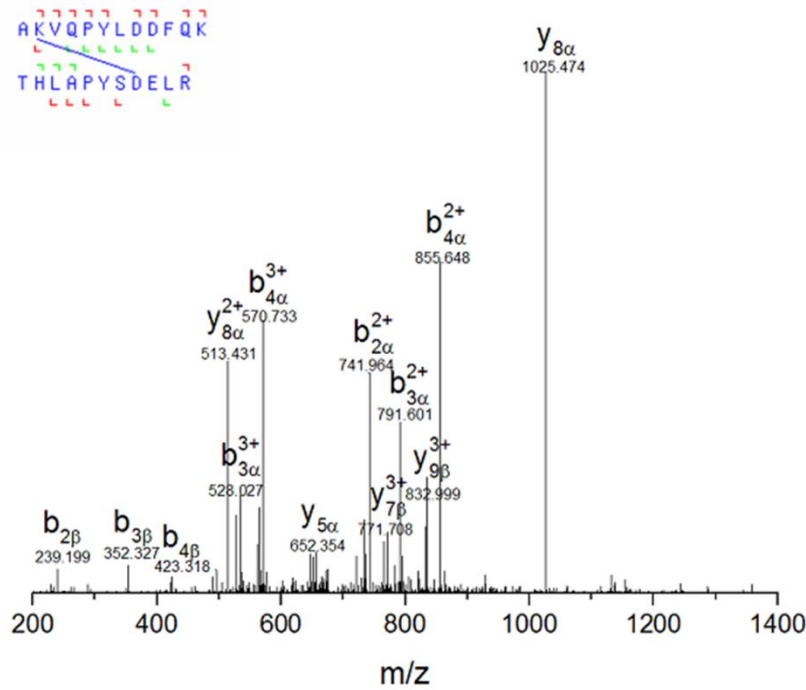

| K96-D168, m/z: 684.351, Charge state: 4 |          |          |                 |               |
|-----------------------------------------|----------|----------|-----------------|---------------|
| fragment type                           | position | ion th   | peak            | delta mz      |
| alpha_common_y_standard_plus1           | 4        | 537.267  | 537.342         | -0.074        |
| alpha_common_y_standard_plus1           | 5        | 652.294  | 652.354         | -0.06         |
| alpha_common_y_standard_plus1           | 6        | 765.378  | 765.442         | -0.063        |
| alpha_common_y_standard_plus1           | 7        | 928.442  | 928.413         | 0.029         |
| alpha_common_y_standard_plus1           | 8        | 1025.494 | 1025.474        | 0.02          |
| alpha_common_y_standard_plus1           | 9        | 1153.553 | 1153.538        | 0.015         |
| alpha_common_y_standard_plus2           | 8        | 513.251  | 513.431         | -0.18         |
| alpha_xlink_b_standard_plus2            | 12       | 1358.691 | 1358.858        | -0.167        |
| alpha_xlink_b_standard_plus2            | 2        | 741.889  | 741.964,742.625 | -0.074,-0.736 |
| alpha_xlink_b_standard_plus2            | 3        | 791.423  | 791.601         | -0.177        |
| alpha_xlink_b_standard_plus2            | 4        | 855.453  | 855.648         | -0.195        |
| alpha_xlink_b_standard_plus3            | 11       | 863.431  | 863.618         | -0.186        |
| alpha_xlink_b_standard_plus3            | 2        | 494.929  | 494.949         | -0.02         |
| alpha_xlink_b_standard_plus3            | 3        | 527.952  | 528.027         | -0.075        |
| alpha_xlink_b_standard_plus3            | 4        | 570.638  | 570.733         | -0.096        |
| alpha_xlink_b_standard_plus3            | 5        | 602.989  | 602.979         | 0.01          |
| alpha_xlink_b_standard_plus3            | 6        | 657.343  | 657.498         | -0.155        |
| alpha_xlink_b_standard_plus3            | 8        | 733.38   | 733.422         | -0.041        |
| alpha_xlink_b_standard_plus3            | 9        | 771.722  | 771.708         | 0.015         |
| alpha_xlink_b_standard_plus4            | 11       | 647.826  | 647.609,648.369 | 0.217,-0.543  |
| alpha_xlink_y_standard_plus4            | 11       | 666.593  | 666.911         | -0.318        |
| beta_common_b_standard_plus1            | 2        | 239.114  | 239.199         | -0.085        |
| beta_common_b_standard_plus1            | 3        | 352.198  | 352.327         | -0.129        |
| beta_common_b_standard_plus1            | 4        | 423.236  | 423.318         | -0.083        |
| beta_common_y_standard_plus1            | 2        | 288.204  | 288.289         | -0.086        |
| beta_xlink_b_standard_plus2             | 11       | 1358.691 | 1358.858        | -0.167        |
| beta_xlink_y_standard_plus2             | 5        | 1026.524 | 1026.606        | -0.082        |
| beta_xlink_y_standard_plus3             | 7        | 771.391  | 771.708         | -0.317        |
| beta_xlink_y_standard_plus3             | 8        | 795.07   | 795.211         | -0.141        |
| beta_xlink_y_standard_plus3             | 9        | 832.764  | 832.999         | -0.234        |

Figure S3.1. The MS/MS spectrum and the list of fragment ions of cross-linked peptide AKVQPYLDDFQK-THLAPYSDEL R in rHDL

Cross-linking and MS/MS reveals multiple registries in APOA1

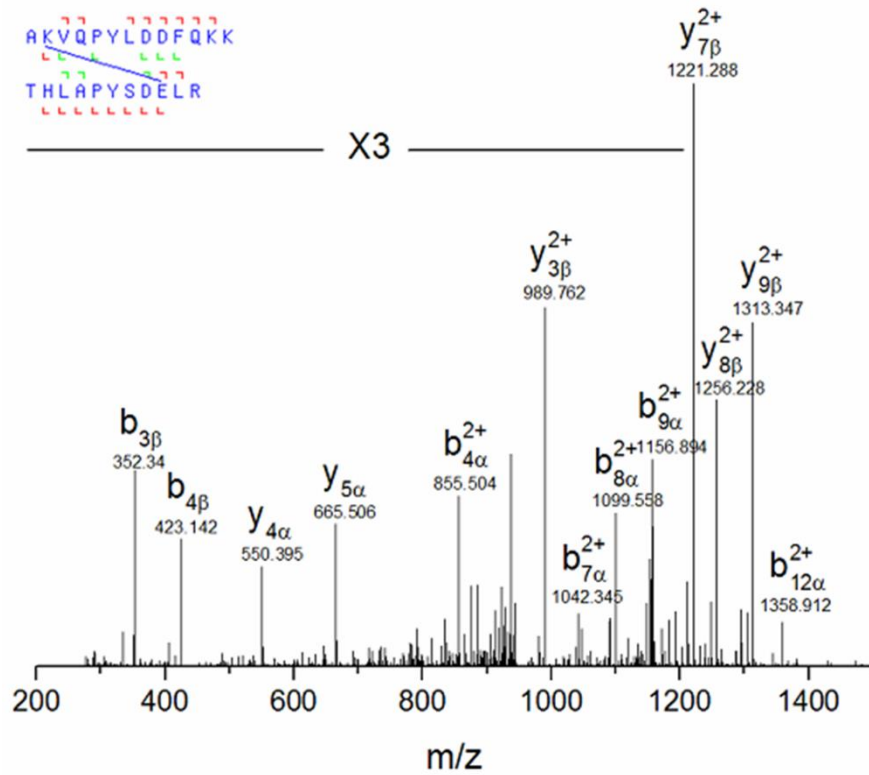

| K96-E169, m/z: 954.831, Charge state: 3 |          |          |                   |               |
|-----------------------------------------|----------|----------|-------------------|---------------|
| fragment type                           | position | ion th   | peak              | delta mz      |
| alpha_common_y_standard_plus1           | 11       | 1380.716 | 1380.579          | 0.137         |
| alpha_common_y_standard_plus1           | 4        | 550.335  | 550.395           | -0.059        |
| alpha_common_y_standard_plus1           | 5        | 665.362  | 665.506           | -0.144        |
| alpha_common_y_standard_plus1           | 6        | 780.389  | 780.534           | -0.144        |
| alpha_common_y_standard_plus1           | 9        | 1153.589 | 1153.545          | 0.045         |
| alpha_xlink_b_standard_plus2            | 10       | 1230.614 | 1230.995          | -0.381        |
| alpha_xlink_b_standard_plus2            | 11       | 1294.643 | 1294.851          | -0.208        |
| alpha_xlink_b_standard_plus2            | 12       | 1358.691 | 1358.912          | -0.222        |
| alpha_xlink_b_standard_plus2            | 3        | 791.423  | 791.492,792.161   | -0.068,-0.737 |
| alpha_xlink_b_standard_plus2            | 4        | 855.453  | 855.504,856.162   | -0.051,-0.709 |
| alpha_xlink_b_standard_plus2            | 7        | 1042.053 | 1042.345          | -0.293        |
| alpha_xlink_b_standard_plus2            | 8        | 1099.566 | 1099.558,1100.246 | 0.008,-0.679  |
| alpha_xlink_b_standard_plus2            | 9        | 1157.08  | 1156.894,1157.594 | 0.185,-0.515  |
| alpha_xlink_b_standard_plus3            | 11       | 863.431  | 863.521           | -0.09         |
| alpha_xlink_b_standard_plus3            | 12       | 906.13   | 906.476           | -0.346        |
| alpha_xlink_b_standard_plus3            | 8        | 733.38   | 733.805           | -0.425        |
| alpha_xlink_y_standard_plus3            | 12       | 931.153  | 931.517           | -0.365        |
| beta_common_b_standard_plus1            | 3        | 352.198  | 352.34            | -0.142        |
| beta_common_b_standard_plus1            | 4        | 423.236  | 423.142           | 0.093         |
| beta_common_b_standard_plus1            | 8        | 885.411  | 885.46            | -0.049        |
| beta_xlink_b_standard_plus2             | 10       | 1344.688 | 1344.782          | -0.095        |
| beta_xlink_b_standard_plus2             | 9        | 1288.146 | 1288.661          | -0.515        |
| beta_xlink_y_standard_plus2             | 3        | 989.542  | 989.762           | -0.22         |
| beta_xlink_y_standard_plus2             | 4        | 1047.055 | 1047.314          | -0.258        |
| beta_xlink_y_standard_plus2             | 5        | 1090.571 | 1090.544,1091.299 | 0.027,-0.728  |
| beta_xlink_y_standard_plus2             | 6        | 1172.103 | 1172.381          | -0.278        |
| beta_xlink_y_standard_plus2             | 7        | 1220.63  | 1220.608,1221.288 | 0.022,-0.659  |
| beta_xlink_y_standard_plus2             | 8        | 1256.148 | 1256.228,1256.921 | -0.079,-0.773 |
| beta_xlink_y_standard_plus2             | 9        | 1312.69  | 1312.693,1313.347 | -0.003,-0.657 |
| beta_xlink_y_standard_plus3             | 10       | 921.149  | 921.411           | -0.262        |
| beta_xlink_y_standard_plus3             | 7        | 814.089  | 814.179           | -0.09         |
| beta_xlink_y_standard_plus3             | 8        | 837.768  | 837.957           | -0.189        |
| beta_xlink_y_standard_plus3             | 9        | 875.463  | 875.675           | -0.213        |

Figure S3.2. The MS/MS spectrum and the list of fragment ions of cross-linked peptide AKVQPYLDDFQK-THLAPYSDELRL in rHDL



Cross-linking and MS/MS reveals multiple registries in APOA1

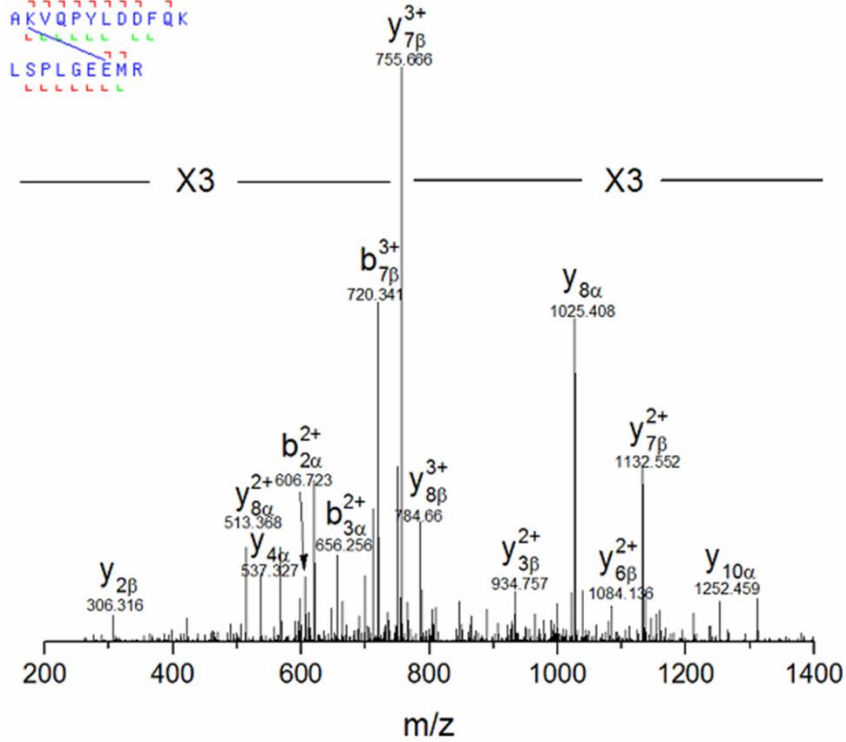

| K96-E147, m/z: 822.092, Charge state:3 |          |          |                   |               |
|----------------------------------------|----------|----------|-------------------|---------------|
| fragment type                          | position | ion th   | peak              | delta mz      |
| alpha_common_y_standard_plus1          | 10       | 1252.621 | 1252.459          | 0.163         |
| alpha_common_y_standard_plus1          | 3        | 422.24   | 422.24            | 0             |
| alpha_common_y_standard_plus1          | 4        | 537.267  | 537.327           | -0.06         |
| alpha_common_y_standard_plus1          | 6        | 765.378  | 765.253           | 0.125         |
| alpha_common_y_standard_plus1          | 7        | 928.442  | 928.488           | -0.046        |
| alpha_common_y_standard_plus1          | 8        | 1025.494 | 1025.408          | 0.086         |
| alpha_common_y_standard_plus1          | 9        | 1153.553 | 1153.513          | 0.04          |
| alpha_common_y_standard_plus2          | 8        | 513.251  | 513.368           | -0.117        |
| alpha_xlink_b_standard_plus2           | 11       | 1159.578 | 1159.774          | -0.196        |
| alpha_xlink_b_standard_plus2           | 2        | 606.824  | 606.723,607.373   | 0.101,-0.549  |
| alpha_xlink_b_standard_plus2           | 3        | 656.359  | 656.256           | 0.103         |
| alpha_xlink_b_standard_plus2           | 4        | 720.388  | 720.341,721.032   | 0.047,-0.644  |
| alpha_xlink_b_standard_plus2           | 5        | 768.914  | 769.305           | -0.391        |
| alpha_xlink_b_standard_plus2           | 6        | 850.446  | 850.574           | -0.128        |
| alpha_xlink_b_standard_plus2           | 7        | 906.988  | 906.736           | 0.252         |
| alpha_xlink_b_standard_plus2           | 8        | 964.501  | 964.421           | 0.081         |
| alpha_xlink_b_standard_plus2           | 9        | 1022.015 | 1022.113          | -0.098        |
| alpha_xlink_b_standard_plus3           | 5        | 512.945  | 513.368           | -0.422        |
| alpha_xlink_y_standard_plus3           | 11       | 798.411  | 798.937           | -0.526        |
| beta_common_y_standard_plus1           | 2        | 306.16   | 306.316           | -0.156        |
| beta_xlink_b_standard_plus2            | 7        | 1080.055 | 1080.184          | -0.129        |
| beta_xlink_b_standard_plus2            | 8        | 1145.575 | 1145.649          | -0.073        |
| beta_xlink_b_standard_plus3            | 7        | 720.373  | 720.341           | 0.032         |
| beta_xlink_y_standard_plus2            | 3        | 934.473  | 934.757           | -0.284        |
| beta_xlink_y_standard_plus2            | 4        | 998.994  | 999.181           | -0.187        |
| beta_xlink_y_standard_plus2            | 5        | 1027.505 | 1027.709          | -0.205        |
| beta_xlink_y_standard_plus2            | 6        | 1084.047 | 1084.136,1084.766 | -0.089,-0.719 |
| beta_xlink_y_standard_plus2            | 7        | 1132.573 | 1132.552,1133.177 | 0.021,-0.604  |
| beta_xlink_y_standard_plus3            | 7        | 755.385  | 755.666           | -0.281        |
| beta_xlink_y_standard_plus3            | 8        | 784.395  | 784.66            | -0.264        |

Figure S3.3. The MS/MS spectrum and the list of fragment ions of cross-linked peptide AKVQPYLDDFQK-LSPLGEEMR in rHDL

Cross-linking and MS/MS reveals multiple registries in APOA1

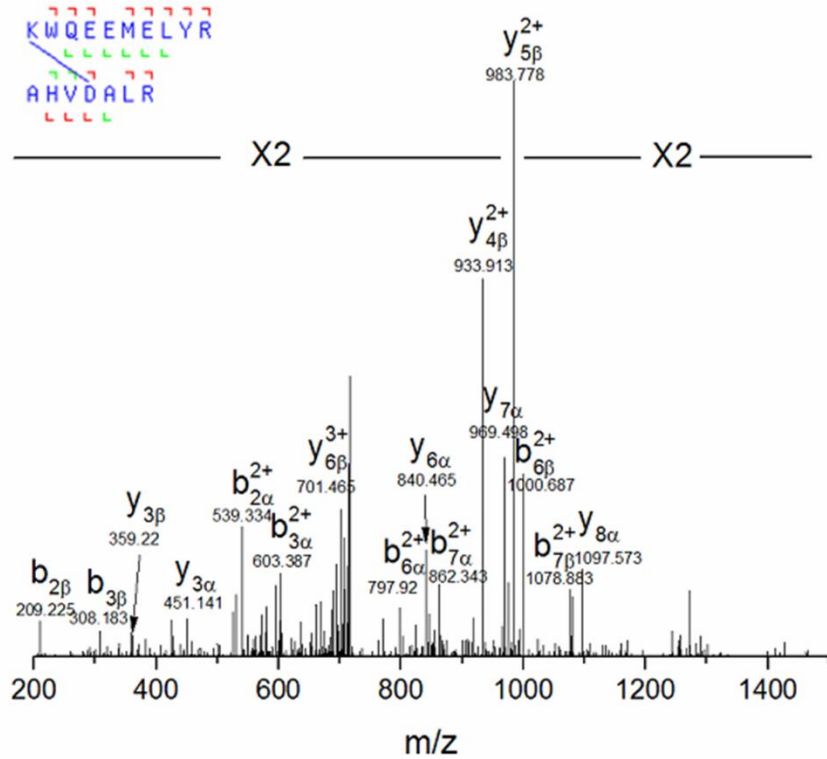

| K107-D157, m/z: 725.367, Charge state: 3 |          |          |                 |              |
|------------------------------------------|----------|----------|-----------------|--------------|
| fragment type                            | position | ion th   | peak            | delta mz     |
| alpha_common_y_standard_plus1            | 3        | 451.267  | 451.141         | 0.126        |
| alpha_common_y_standard_plus1            | 4        | 580.309  | 580.25          | 0.06         |
| alpha_common_y_standard_plus1            | 5        | 711.35   | 711.308         | 0.042        |
| alpha_common_y_standard_plus1            | 6        | 840.393  | 840.465         | -0.072       |
| alpha_common_y_standard_plus1            | 7        | 969.435  | 969.498         | -0.063       |
| alpha_common_y_standard_plus1            | 8        | 1097.494 | 1097.573        | -0.079       |
| alpha_xlink_b_standard_plus2             | 10       | 1078.539 | 1078.883        | -0.344       |
| alpha_xlink_b_standard_plus2             | 2        | 539.302  | 539.334         | -0.032       |
| alpha_xlink_b_standard_plus2             | 3        | 603.331  | 603.387         | -0.056       |
| alpha_xlink_b_standard_plus2             | 4        | 667.852  | 667.952         | -0.1         |
| alpha_xlink_b_standard_plus2             | 6        | 797.894  | 797.92          | -0.026       |
| alpha_xlink_b_standard_plus2             | 7        | 862.415  | 862.343,863.084 | 0.072,-0.669 |
| alpha_xlink_b_standard_plus2             | 8        | 918.957  | 919.045         | -0.088       |
| alpha_xlink_b_standard_plus2             | 9        | 1000.489 | 1000.687        | -0.198       |
| alpha_xlink_b_standard_plus3             | 9        | 667.329  | 667.952         | -0.624       |
| beta_common_b_standard_plus1             | 2        | 209.104  | 209.225         | -0.121       |
| beta_common_b_standard_plus1             | 3        | 308.172  | 308.183         | -0.011       |
| beta_common_y_standard_plus1             | 3        | 359.241  | 359.22          | 0.021        |
| beta_xlink_b_standard_plus2              | 4        | 908.428  | 908.718         | -0.29        |
| beta_xlink_b_standard_plus2              | 6        | 1000.489 | 1000.687        | -0.198       |
| beta_xlink_b_standard_plus2              | 7        | 1078.539 | 1078.883        | -0.344       |
| beta_xlink_b_standard_plus3              | 6        | 667.329  | 667.952         | -0.624       |
| beta_xlink_y_standard_plus2              | 4        | 933.963  | 933.913,934.648 | 0.049,-0.685 |
| beta_xlink_y_standard_plus2              | 5        | 983.497  | 983.778         | -0.282       |
| beta_xlink_y_standard_plus3              | 6        | 701.687  | 701.465,702.102 | 0.222,-0.415 |

Figure S3.4. The MS/MS spectrum and the list of fragment ions of cross-linked peptide **KWQEEMELYR-AHVDALR** in rHDL

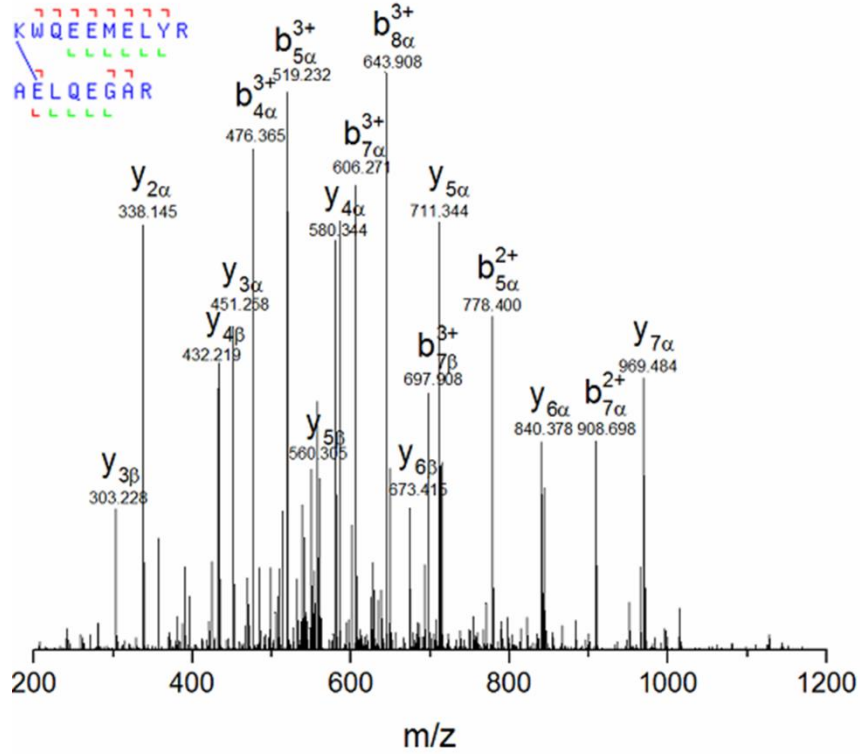

K107-E125, m/z: 567.279, Charge state: 4

| fragment type                 | position | ion th  | peak            | delta mz      |
|-------------------------------|----------|---------|-----------------|---------------|
| alpha common y standard plus1 | 2        | 338.183 | 338.145         | 0.038         |
| alpha common y standard plus1 | 3        | 451.267 | 451.258         | 0.009         |
| alpha common y standard plus1 | 4        | 580.309 | 580.344         | -0.035        |
| alpha common y standard plus1 | 5        | 711.35  | 711.344         | 0.006         |
| alpha common y standard plus1 | 6        | 840.393 | 840.378         | 0.015         |
| alpha common y standard plus1 | 7        | 969.435 | 969.484         | -0.049        |
| alpha common y standard plus2 | 7        | 485.221 | 485.142         | 0.08          |
| alpha xlink b standard plus2  | 2        | 585.307 | 585.380,586.016 | -0.073,-0.709 |
| alpha xlink b standard plus2  | 3        | 649.337 | 649.313,650.097 | 0.024,-0.760  |
| alpha xlink b standard plus2  | 4        | 713.858 | 713.738,714.576 | 0.120,-0.718  |
| alpha xlink b standard plus2  | 5        | 778.379 | 778.400,779.103 | -0.021,-0.724 |
| alpha xlink b standard plus2  | 6        | 843.899 | 844.104         | -0.205        |
| alpha xlink b standard plus2  | 7        | 908.421 | 908.698         | -0.277        |
| alpha xlink b standard plus2  | 8        | 964.963 | 965.309         | -0.346        |
| alpha xlink b standard plus3  | 2        | 390.541 | 390.66          | -0.119        |
| alpha xlink b standard plus3  | 3        | 433.227 | 433.388         | -0.161        |
| alpha xlink b standard plus3  | 4        | 476.241 | 476.365         | -0.124        |
| alpha xlink b standard plus3  | 5        | 519.255 | 519.232,519.865 | 0.024,-0.610  |
| alpha xlink b standard plus3  | 7        | 605.95  | 606.271         | -0.321        |
| alpha xlink b standard plus3  | 8        | 643.644 | 643.908         | -0.263        |
| alpha xlink b standard plus3  | 9        | 697.999 | 697.908,698.622 | 0.091,-0.623  |
| beta common y standard plus1  | 3        | 303.178 | 303.228         | -0.05         |
| beta common y standard plus1  | 4        | 432.221 | 432.219         | 0.001         |
| beta common y standard plus1  | 5        | 560.279 | 560.305         | -0.026        |
| beta common y standard plus1  | 6        | 673.363 | 673.415         | -0.051        |
| beta common y standard plus2  | 6        | 337.186 | 337.3           | -0.114        |
| beta xlink b standard plus2   | 2        | 797.372 | 797.593         | -0.221        |
| beta xlink b standard plus3   | 2        | 531.918 | 531.941         | -0.024        |
| beta xlink b standard plus3   | 6        | 674.32  | 674.387         | -0.067        |
| beta xlink b standard plus3   | 7        | 697.999 | 697.908,698.622 | 0.091,-0.623  |
| beta xlink y standard plus4   | 7        | 549.52  | 549.528         | -0.008        |

Figure S3.5. The MS/MS spectrum and the list of fragment ions of cross-linked peptide **KWQEEMELYR-AELQEGAR** in rHDL

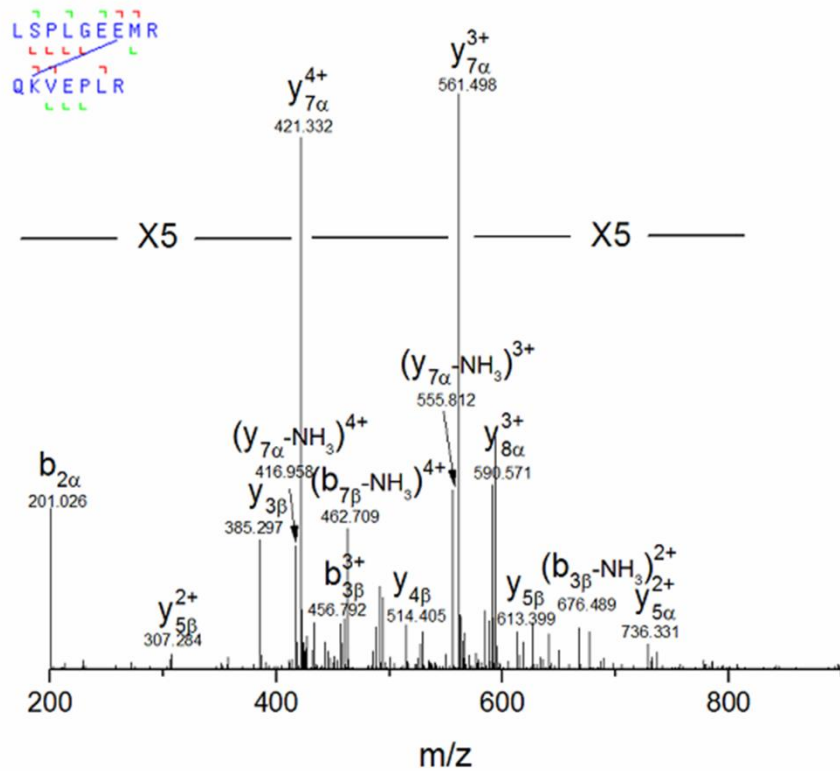

K118-E147, m/z: 471.262, Charge state: 4

| fragment type                 | position | ion th  | peak    | delta mz |
|-------------------------------|----------|---------|---------|----------|
| alpha_common_b_standard_plus1 | 2        | 201.124 | 201.026 | 0.098    |
| alpha_common_b_standard_plus1 | 4        | 411.261 | 411.192 | 0.069    |
| alpha_common_b_standard_plus1 | 6        | 597.325 | 597.238 | 0.086    |
| alpha_common_y_standard_plus1 | 2        | 306.16  | 306.329 | -0.169   |
| alpha_xlink_b_standard_plus3  | 7        | 526.295 | 526.923 | -0.627   |
| alpha_xlink_b_standard_plus3  | 8        | 569.975 | 569.834 | 0.141    |
| alpha_xlink_b_standard_plus4  | 8        | 427.733 | 427.458 | 0.275    |
| alpha_xlink_y_-NH3_plus3      | 7        | 555.632 | 555.812 | -0.181   |
| alpha_xlink_y_-NH3_plus4      | 7        | 416.976 | 416.958 | 0.018    |
| alpha_xlink_y_standard_plus2  | 5        | 736.388 | 736.331 | 0.058    |
| alpha_xlink_y_standard_plus3  | 5        | 491.262 | 491.499 | -0.237   |
| alpha_xlink_y_standard_plus3  | 6        | 528.956 | 529.186 | -0.229   |
| alpha_xlink_y_standard_plus3  | 7        | 561.307 | 561.498 | -0.191   |
| alpha_xlink_y_standard_plus3  | 8        | 590.318 | 590.571 | -0.253   |
| alpha_xlink_y_standard_plus4  | 7        | 421.232 | 421.332 | -0.099   |
| alpha_xlink_y_standard_plus4  | 8        | 442.99  | 443.053 | -0.063   |
| beta_common_y_standard_plus1  | 3        | 385.256 | 385.297 | -0.041   |
| beta_common_y_standard_plus1  | 4        | 514.299 | 514.405 | -0.107   |
| beta_common_y_standard_plus1  | 5        | 613.367 | 613.399 | -0.032   |
| beta_common_y_standard_plus2  | 5        | 307.188 | 307.284 | -0.097   |
| beta_xlink_b_-NH3_plus2       | 3        | 676.356 | 676.489 | 0.19     |
| beta_xlink_b_-NH3_plus4       | 7        | 462.502 | 462.709 | -0.207   |
| beta_xlink_b_standard_plus2   | 2        | 635.335 | 635.285 | 0.05     |
| beta_xlink_b_standard_plus3   | 2        | 423.893 | 424.175 | -0.282   |
| beta_xlink_b_standard_plus3   | 3        | 456.916 | 456.792 | 0.124    |
| beta_xlink_b_standard_plus3   | 6        | 569.975 | 569.834 | 0.141    |
| beta_xlink_b_standard_plus4   | 6        | 427.733 | 427.458 | 0.275    |

Figure S3.6. The MS/MS spectrum and the list of fragment ions of cross-linked peptide LSPLGEE MR-QKVEPLR in rHDL

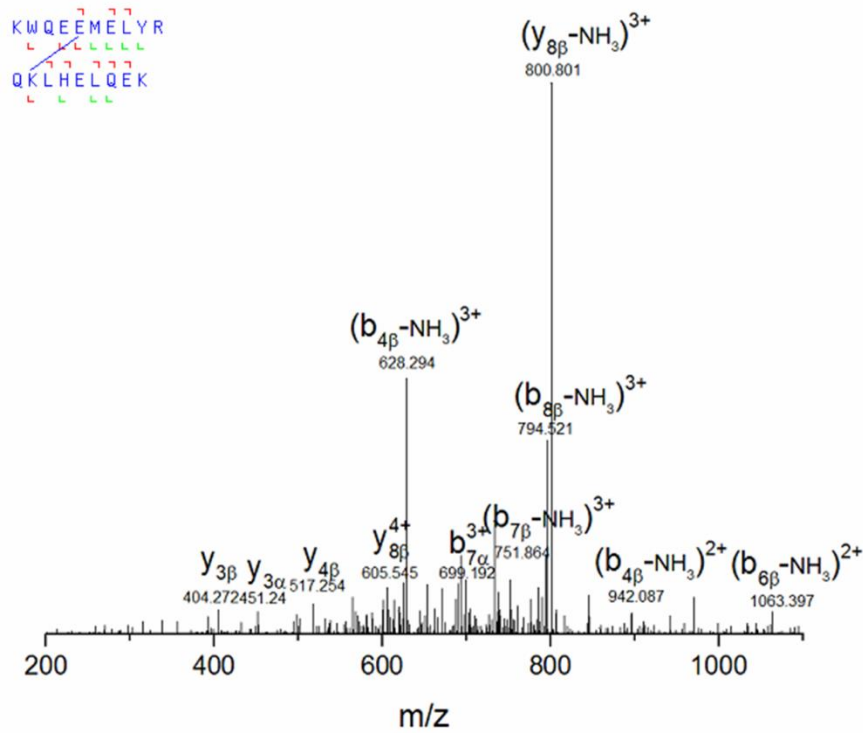

K133-E111, m/z: 637.078, Charge state: 4

| fragment type                 | position | ion th   | peak            | delta mz     |
|-------------------------------|----------|----------|-----------------|--------------|
| alpha_common_y_standard_plus1 | 2        | 338.183  | 338.244         | -0.061       |
| alpha_common_y_standard_plus1 | 3        | 451.267  | 451.24          | 0.027        |
| alpha_common_y_standard_plus1 | 4        | 580.309  | 580.481         | -0.172       |
| alpha_common_y_standard_plus1 | 5        | 711.35   | 711.262         | 0.088        |
| alpha_common_y_standard_plus2 | 5        | 356.179  | 356.061         | 0.118        |
| alpha_xlink_b_standard_plus3  | 5        | 612.32   | 612.692         | -0.372       |
| alpha_xlink_b_standard_plus3  | 7        | 699.015  | 699.192         | -0.178       |
| alpha_xlink_b_standard_plus3  | 8        | 736.709  | 737.068         | -0.359       |
| alpha_xlink_y_standard_plus3  | 7        | 701.69   | 702.191         | -0.501       |
| alpha_xlink_y_standard_plus3  | 9        | 806.403  | 806.360,807.023 | 0.043,-0.620 |
| alpha_xlink_y_standard_plus4  | 6        | 494.259  | 494.503         | -0.244       |
| alpha_xlink_y_standard_plus4  | 9        | 605.054  | 605.545         | -0.491       |
| beta_common_y_standard_plus1  | 3        | 404.215  | 404.272         | -0.058       |
| beta_common_y_standard_plus1  | 4        | 517.299  | 517.254         | 0.045        |
| beta_common_y_standard_plus1  | 6        | 783.4    | 783.537         | -0.137       |
| beta_xlink_b_-NH3_plus2       | 4        | 941.968  | 942.087         | -0.119       |
| beta_xlink_b_-NH3_plus2       | 6        | 1063.031 | 1063.397        | -0.367       |
| beta_xlink_b_-NH3_plus3       | 4        | 628.314  | 628.294         | 0.02         |
| beta_xlink_b_-NH3_plus3       | 7        | 751.709  | 751.864         | -0.155       |
| beta_xlink_b_-NH3_plus3       | 8        | 794.724  | 794.521,795.132 | 0.202,-0.409 |
| beta_xlink_b_standard_plus3   | 3        | 588.304  | 588.54          | -0.236       |
| beta_xlink_b_standard_plus3   | 7        | 757.385  | 757.669         | -0.284       |
| beta_xlink_b_standard_plus3   | 8        | 800.399  | 800.801         | -0.402       |
| beta_xlink_b_standard_plus4   | 7        | 568.291  | 568.352         | -0.061       |
| beta_xlink_b_standard_plus4   | 8        | 600.551  | 600.486         | 0.066        |
| beta_xlink_y_-NH3_plus3       | 8        | 800.739  | 800.801         | -0.062       |
| beta_xlink_y_standard_plus3   | 8        | 806.415  | 806.360,807.023 | 0.055,-0.608 |
| beta_xlink_y_standard_plus4   | 8        | 605.063  | 605.545         | -0.482       |

Figure S3.7. The MS/MS spectrum and the list of fragment ions of cross-linked peptide KWQEEMELYR-QKLHELQEK in rHDL

Cross-linking and MS/MS reveals multiple registries in APOA1

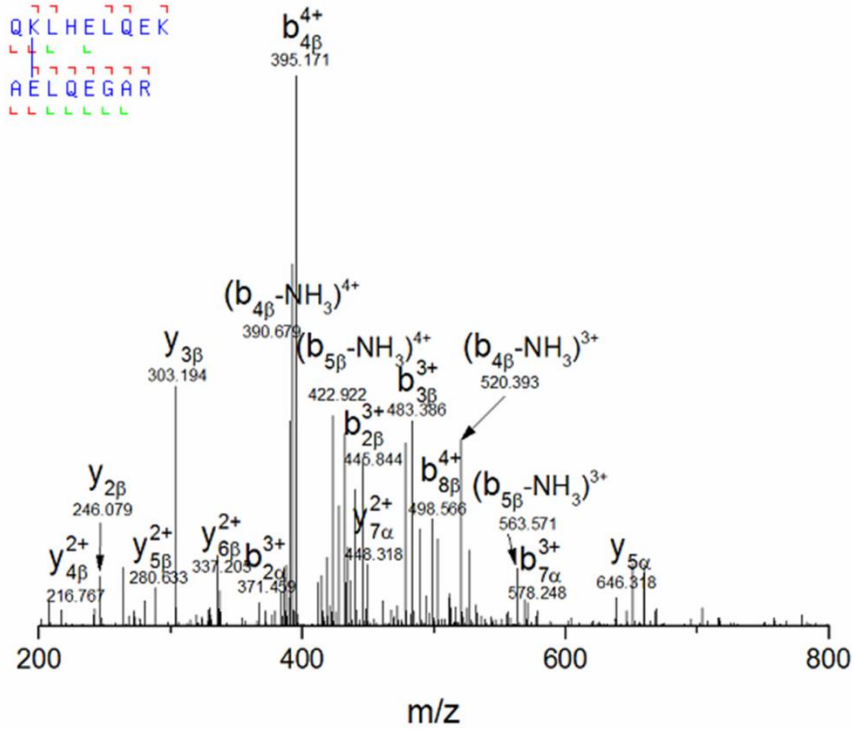

K133-E125, m/z: 402.22, Charge state: 5

| fragment type                 | position | ion th  | peak            | delta mz     |
|-------------------------------|----------|---------|-----------------|--------------|
| alpha_common_y_standard_plus1 | 5        | 646.341 | 646.318         | 0.023        |
| alpha_common_y_standard_plus2 | 7        | 448.746 | 448.828         | -0.082       |
| alpha_xlink_b_standard_plus2  | 2        | 556.297 | 556.772         | -0.475       |
| alpha_xlink_b_standard_plus3  | 2        | 371.201 | 371.459         | -0.259       |
| alpha_xlink_b_standard_plus3  | 6        | 535.29  | 535.377         | -0.087       |
| alpha_xlink_b_standard_plus3  | 7        | 577.977 | 578.248         | -0.271       |
| alpha_xlink_b_standard_plus4  | 9        | 498.019 | 498.566         | -0.547       |
| alpha_xlink_b_standard_plus5  | 3        | 245.74  | 246.079         | -0.339       |
| beta_common_y_standard_plus1  | 2        | 246.157 | 246.079         | 0.078        |
| beta_common_y_standard_plus1  | 3        | 303.178 | 303.194         | -0.016       |
| beta_common_y_standard_plus1  | 4        | 432.221 | 432.239         | -0.018       |
| beta_common_y_standard_plus2  | 4        | 216.614 | 216.767         | -0.153       |
| beta_common_y_standard_plus2  | 5        | 280.644 | 280.633         | 0.011        |
| beta_common_y_standard_plus2  | 6        | 337.186 | 337.205         | -0.02        |
| beta_xlink_b_-NH3_plus3       | 4        | 520.28  | 520.393         | -0.114       |
| beta_xlink_b_-NH3_plus3       | 5        | 563.294 | 563.571         | -0.278       |
| beta_xlink_b_-NH3_plus4       | 4        | 390.462 | 390.679         | -0.217       |
| beta_xlink_b_-NH3_plus4       | 5        | 422.722 | 422.922         | -0.2         |
| beta_xlink_b_-NH3_plus5       | 8        | 395.211 | 395.171         | 0.041        |
| beta_xlink_b_standard_plus2   | 2        | 667.857 | 667.886         | -0.028       |
| beta_xlink_b_standard_plus3   | 2        | 445.574 | 445.844         | -0.27        |
| beta_xlink_b_standard_plus3   | 3        | 483.269 | 483.386         | -0.117       |
| beta_xlink_b_standard_plus3   | 4        | 525.955 | 526.265         | -0.31        |
| beta_xlink_b_standard_plus3   | 5        | 568.969 | 568.946         | 0.023        |
| beta_xlink_b_standard_plus4   | 4        | 394.718 | 395.171         | -0.452       |
| beta_xlink_b_standard_plus4   | 5        | 426.979 | 427.276         | -0.297       |
| beta_xlink_b_standard_plus4   | 6        | 441.234 | 440.983,441.677 | 0.251,-0.443 |
| beta_xlink_b_standard_plus4   | 8        | 498.019 | 498.566         | -0.547       |
| beta_xlink_b_standard_plus5   | 2        | 267.748 | 268.07          | -0.322       |
| beta_xlink_b_standard_plus5   | 7        | 367.396 | 367.263         | 0.134        |
| beta_xlink_y_standard_plus3   | 7        | 646.014 | 646.318         | -0.304       |
| beta_xlink_y_standard_plus4   | 8        | 502.521 | 502.372         | 0.149        |
| beta_xlink_y_standard_plus5   | 7        | 388.011 | 387.858         | 0.153        |

Figure S3.8. The MS/MS spectrum and the list of fragment ions of cross-linked peptide QKLHELQEK-AELQEGAR in rHDL

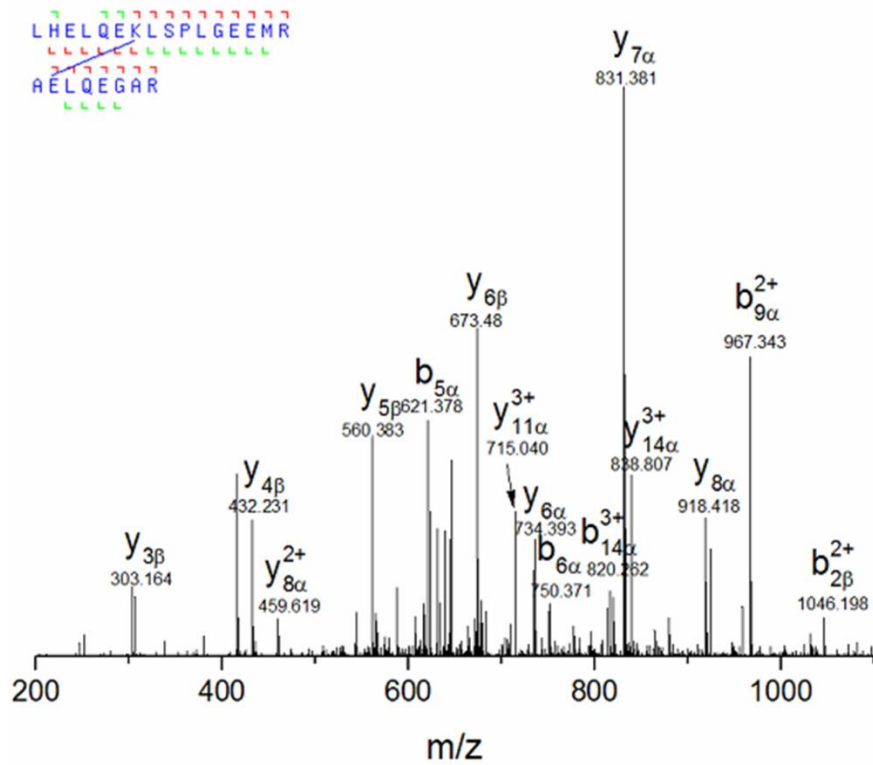

K140-E125, m/z: 691.609, Charge state: 4

| fragment type                 | position | ion th  | peak            | delta mz      |
|-------------------------------|----------|---------|-----------------|---------------|
| alpha_common_b_standard_plus1 | 2        | 251.151 | 251.14          | 0.011         |
| alpha_common_b_standard_plus1 | 5        | 621.336 | 621.378         | -0.041        |
| alpha_common_b_standard_plus1 | 8        | 750.379 | 750.371         | 0.008         |
| alpha_common_y_standard_plus1 | 2        | 306.16  | 306.143         | 0.017         |
| alpha_common_y_standard_plus1 | 3        | 435.203 | 435.276         | -0.073        |
| alpha_common_y_standard_plus1 | 4        | 564.245 | 564.42          | -0.175        |
| alpha_common_y_standard_plus1 | 5        | 621.267 | 621.378         | -0.111        |
| alpha_common_y_standard_plus1 | 6        | 734.351 | 734.393         | -0.042        |
| alpha_common_y_standard_plus1 | 7        | 831.403 | 831.381         | 0.023         |
| alpha_common_y_standard_plus1 | 8        | 918.435 | 918.418         | 0.018         |
| alpha_common_y_standard_plus1 | 9        | 1031.52 | 1031.553        | -0.033        |
| alpha_common_y_standard_plus2 | 8        | 459.722 | 459.619         | 0.102         |
| alpha_xlink_b_standard_plus2  | 16       | 1373.2  | 1373.889        | -0.686        |
| alpha_xlink_b_standard_plus2  | 7        | 866.953 | 867.409         | -0.456        |
| alpha_xlink_b_standard_plus2  | 8        | 923.495 | 923.927         | -0.432        |
| alpha_xlink_b_standard_plus2  | 9        | 967.011 | 967.343         | -0.332        |
| alpha_xlink_b_standard_plus3  | 10       | 677.361 | 677.376         | -0.015        |
| alpha_xlink_b_standard_plus3  | 11       | 715.056 | 715.040,715.646 | 0.016,-0.591  |
| alpha_xlink_b_standard_plus3  | 12       | 734.063 | 734.393         | -0.33         |
| alpha_xlink_b_standard_plus3  | 13       | 777.077 | 777.313         | -0.236        |
| alpha_xlink_b_standard_plus3  | 14       | 820.091 | 820.262         | -0.171        |
| alpha_xlink_b_standard_plus3  | 15       | 863.771 | 864.031         | -0.26         |
| alpha_xlink_b_standard_plus3  | 8        | 615.999 | 616.227         | -0.228        |
| alpha_xlink_b_standard_plus3  | 9        | 645.01  | 645.059         | -0.049        |
| alpha_xlink_y_standard_plus3  | 10       | 672.018 | 671.799         | 0.219         |
| alpha_xlink_y_standard_plus3  | 11       | 715.032 | 715.040,715.646 | -0.007,-0.614 |
| alpha_xlink_y_standard_plus3  | 12       | 757.719 | 758.088         | -0.369        |
| alpha_xlink_y_standard_plus3  | 13       | 795.413 | 795.57          | -0.157        |
| alpha_xlink_y_standard_plus3  | 14       | 838.428 | 838.807         | -0.38         |
| alpha_xlink_y_standard_plus4  | 15       | 863.337 | 863.611         | -0.273        |
| beta_common_y_standard_plus1  | 3        | 303.178 | 303.164         | 0.014         |
| beta_common_y_standard_plus1  | 4        | 432.221 | 432.231         | -0.01         |
| beta_common_y_standard_plus1  | 5        | 560.279 | 560.383         | -0.104        |
| beta_common_y_standard_plus1  | 6        | 673.363 | 673.48          | -0.117        |
| beta_common_y_standard_plus2  | 6        | 337.186 | 337.284         | -0.099        |
| beta_xlink_b_standard_plus2   | 2        | 1046.03 | 1046.198        | -0.167        |
| beta_xlink_b_standard_plus2   | 8        | 1373.2  | 1373.889        | -0.686        |
| beta_xlink_b_standard_plus3   | 3        | 735.385 | 735.656         | -0.271        |
| beta_xlink_b_standard_plus3   | 4        | 778.071 | 778.367         | -0.296        |
| beta_xlink_b_standard_plus3   | 5        | 821.085 | 821.147         | -0.062        |
| beta_xlink_b_standard_plus3   | 7        | 863.771 | 864.031         | -0.26         |
| beta_xlink_b_standard_plus4   | 5        | 616.066 | 616.227         | -0.161        |
| beta_xlink_b_standard_plus4   | 6        | 630.321 | 630.787         | -0.466        |

Figure S3.9. The MS/MS spectrum and the list of fragment ions of cross-linked peptide LHELQEKLSPLGEE MR-AELQEGAR in rHDL

Cross-linking and MS/MS reveals multiple registries in APOA1

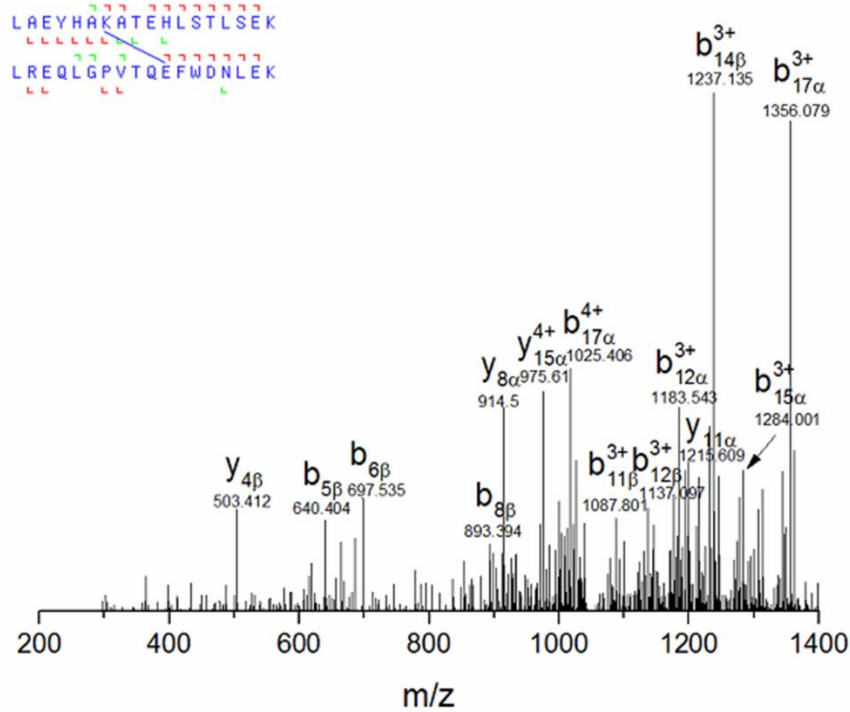

195-70, m/z: 1053.543, Charge state: 4

| fragment type                 | position | ion th   | peak              | delta mz     |
|-------------------------------|----------|----------|-------------------|--------------|
| alpha_common_b_standard_plus1 | 6        | 685.331  | 685.22            | 0.111        |
| alpha_common_y_standard_plus1 | 10       | 1144.585 | 1144.439          | 0.146        |
| alpha_common_y_standard_plus1 | 11       | 1215.622 | 1215.609          | 0.013        |
| alpha_common_y_standard_plus1 | 8        | 914.495  | 914.5             | -0.005       |
| alpha_xlink_b_standard_plus3  | 10       | 1099.89  | 1099.925          | -0.035       |
| alpha_xlink_b_standard_plus3  | 11       | 1145.576 | 1145.523          | 0.053        |
| alpha_xlink_b_standard_plus3  | 12       | 1183.271 | 1183.543          | -0.272       |
| alpha_xlink_b_standard_plus3  | 13       | 1212.282 | 1212.62           | -0.338       |
| alpha_xlink_b_standard_plus3  | 14       | 1245.964 | 1245.737,1246.526 | 0.227,-0.562 |
| alpha_xlink_b_standard_plus3  | 15       | 1283.659 | 1284.001          | -0.342       |
| alpha_xlink_b_standard_plus3  | 16       | 1312.67  | 1312.957          | -0.287       |
| alpha_xlink_b_standard_plus3  | 17       | 1355.684 | 1356.079          | -0.395       |
| alpha_xlink_b_standard_plus3  | 7        | 999.514  | 999.845           | -0.331       |
| alpha_xlink_b_standard_plus3  | 8        | 1023.193 | 1023.142,1023.774 | 0.051,-0.580 |
| alpha_xlink_b_standard_plus4  | 17       | 1017.015 | 1017.282          | -0.267       |
| alpha_xlink_y_standard_plus3  | 12       | 1176.278 | 1176.114          | 0.164        |
| alpha_xlink_y_standard_plus3  | 13       | 1199.957 | 1200.082          | -0.125       |
| alpha_xlink_y_standard_plus3  | 14       | 1245.643 | 1245.737          | -0.094       |
| alpha_xlink_y_standard_plus4  | 15       | 975.25   | 975.61            | -0.359       |
| alpha_xlink_y_standard_plus4  | 16       | 1007.511 | 1007.585          | -0.074       |
| alpha_xlink_y_standard_plus4  | 17       | 1025.27  | 1025.406          | -0.136       |
| beta_common_b_standard_plus1  | 5        | 640.378  | 640.404           | -0.026       |
| beta_common_b_standard_plus1  | 6        | 697.4    | 697.535           | -0.136       |
| beta_common_b_standard_plus1  | 8        | 893.521  | 893.394           | 0.127        |
| beta_common_y_standard_plus1  | 4        | 503.283  | 503.412           | -0.129       |
| beta_xlink_b_standard_plus3   | 11       | 1087.569 | 1087.801          | -0.232       |
| beta_xlink_b_standard_plus3   | 12       | 1136.592 | 1137.097          | -0.505       |
| beta_xlink_b_standard_plus3   | 13       | 1198.618 | 1198.841          | -0.223       |
| beta_xlink_b_standard_plus3   | 14       | 1236.961 | 1237.135          | -0.175       |
| beta_xlink_b_standard_plus3   | 15       | 1274.975 | 1275.192          | -0.217       |
| beta_xlink_b_standard_plus3   | 16       | 1312.67  | 1312.957          | -0.287       |
| beta_xlink_b_standard_plus3   | 17       | 1355.684 | 1356.079          | -0.395       |
| beta_xlink_b_standard_plus4   | 17       | 1017.015 | 1017.282          | -0.267       |
| beta_xlink_y_standard_plus3   | 11       | 1139.904 | 1140.5            | -0.596       |
| beta_xlink_y_standard_plus3   | 12       | 1172.255 | 1172.409          | -0.154       |
| beta_xlink_y_standard_plus3   | 16       | 1314.657 | 1314.809          | -0.152       |
| beta_xlink_y_standard_plus4   | 17       | 1025.27  | 1025.406          | -0.136       |

Figure S3.10. The MS/MS spectrum and the list of fragment ions of cross-linked peptide LAEYHAKATEHLSTLSEK-LREQLGPVTQEFWDNLEK in rHDL



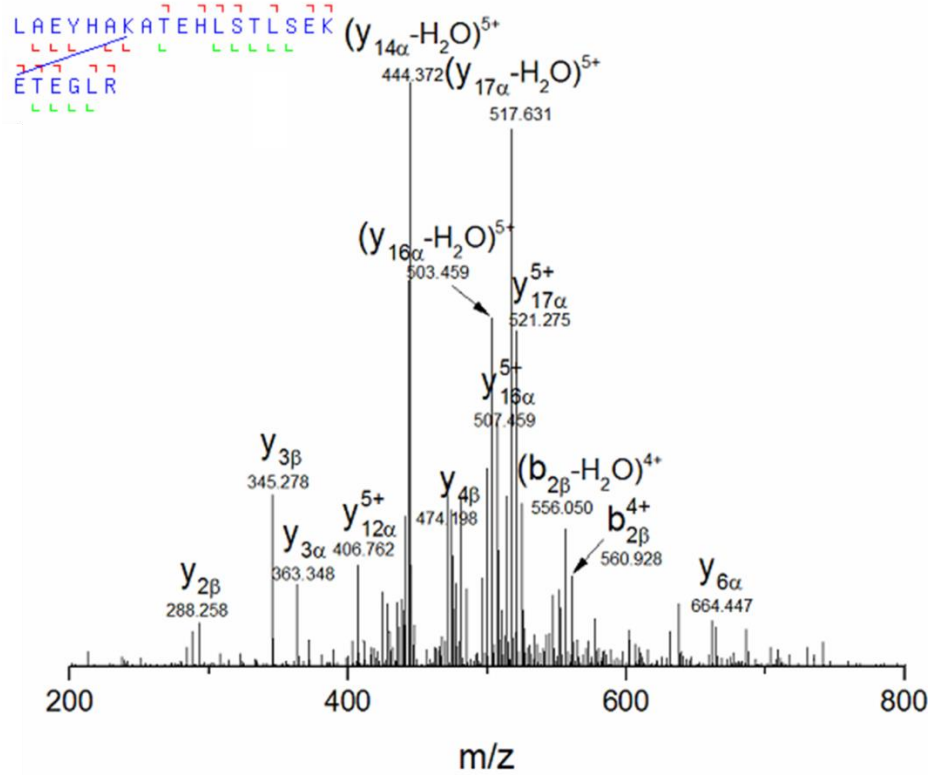

K195-E78, m/z: 453.073, Charge state: 6

| fragment type                 | position | ion th  | peak            | delta mz     |
|-------------------------------|----------|---------|-----------------|--------------|
| alpha_common_y_standard_plus1 | 3        | 363.188 | 363.348         | -0.16        |
| alpha_common_y_standard_plus1 | 4        | 476.272 | 476.13          | 0.142        |
| alpha_common_y_standard_plus1 | 5        | 577.32  | 577.15          | 0.17         |
| alpha_common_y_standard_plus1 | 6        | 664.352 | 664.447         | -0.096       |
| alpha_common_y_standard_plus2 | 10       | 572.796 | 572.684         | 0.113        |
| alpha_common_y_standard_plus2 | 7        | 389.222 | 389.223         | -0.001       |
| alpha_xlink_b_standard_plus4  | 11       | 484.994 | 485.294         | -0.3         |
| alpha_xlink_b_standard_plus4  | 13       | 535.023 | 535.397         | -0.374       |
| alpha_xlink_b_standard_plus4  | 15       | 588.556 | 588.851         | -0.295       |
| alpha_xlink_b_standard_plus4  | 9        | 418.468 | 418.187         | 0.281        |
| alpha_xlink_b_standard_plus5  | 12       | 410.813 | 411.177         | -0.364       |
| alpha_xlink_b_standard_plus5  | 15       | 471.046 | 471.342         | -0.296       |
| alpha_xlink_b_standard_plus5  | 17       | 514.261 | 514.068         | 0.193        |
| alpha_xlink_b_standard_plus5  | 18       | 539.88  | 540.372         | -0.492       |
| alpha_xlink_y_-H2O_plus5      | 14       | 444.635 | 444.372         | 0.263        |
| alpha_xlink_y_-H2O_plus5      | 16       | 503.056 | 503.459         | -0.403       |
| alpha_xlink_y_-H2O_plus5      | 17       | 517.263 | 517.631         | -0.368       |
| alpha_xlink_y_standard_plus4  | 12       | 508.02  | 508.155         | -0.135       |
| alpha_xlink_y_standard_plus4  | 13       | 525.779 | 525.916         | -0.136       |
| alpha_xlink_y_standard_plus5  | 12       | 406.618 | 406.762         | -0.145       |
| alpha_xlink_y_standard_plus5  | 15       | 480.849 | 480.981         | -0.131       |
| alpha_xlink_y_standard_plus5  | 16       | 506.658 | 507.02          | -0.362       |
| alpha_xlink_y_standard_plus5  | 17       | 520.865 | 521.275         | -0.41        |
| beta_common_y_standard_plus1  | 2        | 288.204 | 288.258         | -0.054       |
| beta_common_y_standard_plus1  | 3        | 345.225 | 345.278         | -0.053       |
| beta_common_y_standard_plus1  | 4        | 474.268 | 474.198         | 0.07         |
| beta_common_y_standard_plus2  | 5        | 288.162 | 288.258         | -0.096       |
| beta_xlink_b_-H2O_plus4       | 2        | 556.283 | 556.050,556.657 | 0.233,-0.373 |
| beta_xlink_b_standard_plus4   | 1        | 535.524 | 535.397         | 0.127        |
| beta_xlink_b_standard_plus4   | 2        | 560.786 | 560.928         | -0.142       |
| beta_xlink_b_standard_plus5   | 1        | 428.621 | 428.751         | -0.131       |
| beta_xlink_b_standard_plus5   | 3        | 474.639 | 475.059         | -0.42        |
| beta_xlink_b_standard_plus5   | 5        | 508.66  | 508.994         | -0.334       |
| beta_xlink_b_standard_plus5   | 6        | 539.88  | 540.372         | -0.492       |

Figure S3.11. The MS/MS spectrum and the list of fragment ions of cross-linked peptide LAEYHAKATEHLSTLSEK-ETEGLR in rHDL

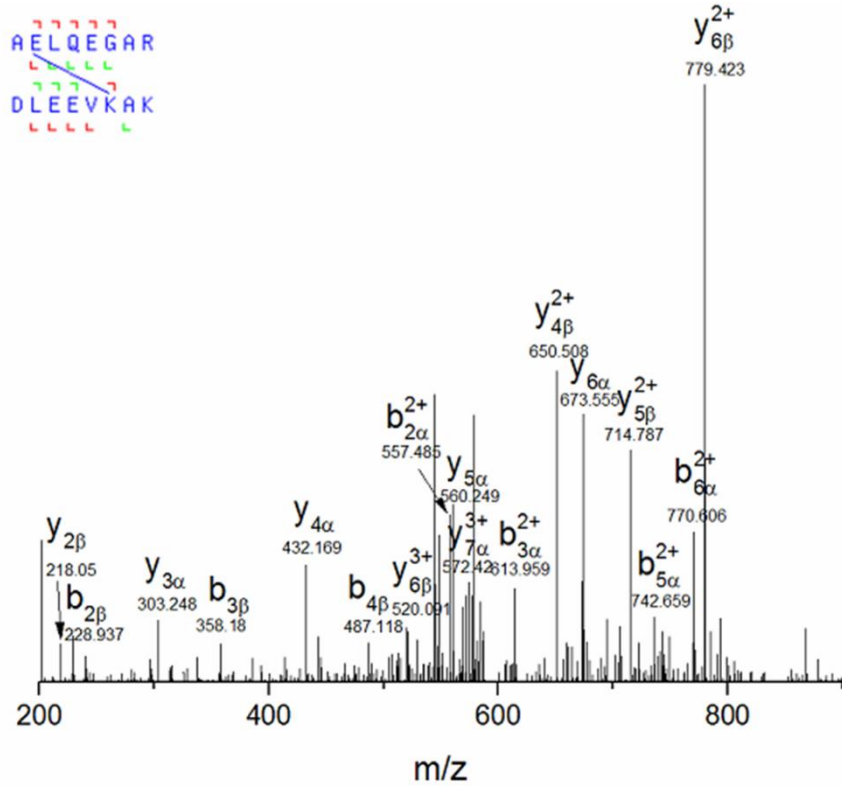

K94-E125, m/z: 595.984, Charge state: 3

| fragment type                 | position | ion th  | peak            | delta mz      |
|-------------------------------|----------|---------|-----------------|---------------|
| alpha_common_y_standard_plus1 | 3        | 303.178 | 303.248         | -0.07         |
| alpha_common_y_standard_plus1 | 4        | 432.221 | 432.169         | 0.051         |
| alpha_common_y_standard_plus1 | 5        | 560.279 | 560.249         | 0.03          |
| alpha_common_y_standard_plus1 | 6        | 673.363 | 673.555         | -0.192        |
| alpha_common_y_standard_plus2 | 6        | 337.186 | 337.359         | -0.173        |
| alpha_xlink_b_standard_plus2  | 2        | 557.294 | 557.485         | -0.191        |
| alpha_xlink_b_standard_plus2  | 3        | 613.836 | 613.959         | -0.124        |
| alpha_xlink_b_standard_plus2  | 4        | 677.865 | 677.851         | 0.014         |
| alpha_xlink_b_standard_plus2  | 5        | 742.386 | 742.659         | -0.273        |
| alpha_xlink_b_standard_plus2  | 6        | 770.897 | 770.606,771.373 | 0.290,-0.476  |
| alpha_xlink_b_standard_plus3  | 6        | 514.267 | 514.336         | -0.069        |
| alpha_xlink_y_standard_plus3  | 7        | 572.304 | 572.42          | -0.115        |
| beta_common_b_standard_plus1  | 2        | 229.119 | 228.937         | 0.182         |
| beta_common_b_standard_plus1  | 3        | 358.161 | 358.18          | -0.019        |
| beta_common_b_standard_plus1  | 4        | 487.204 | 487.118         | 0.086         |
| beta_common_y_standard_plus1  | 2        | 218.15  | 218.05          | 0.1           |
| beta_xlink_b_standard_plus2   | 6        | 784.9   | 784.643         | 0.257         |
| beta_xlink_y_standard_plus2   | 4        | 650.373 | 650.508         | -0.135        |
| beta_xlink_y_standard_plus2   | 5        | 714.894 | 714.787,715.462 | 0.108,-0.567  |
| beta_xlink_y_standard_plus2   | 6        | 779.416 | 779.423,780.058 | -0.007,-0.642 |
| beta_xlink_y_standard_plus3   | 6        | 519.946 | 520.091         | -0.145        |
| beta_xlink_y_standard_plus3   | 7        | 557.641 | 557.485         | 0.156         |

Figure S4.1. The MS/MS spectrum and the list of fragment ions of cross-linked peptide AELQEGAR-DLEEVKAK in human HDL

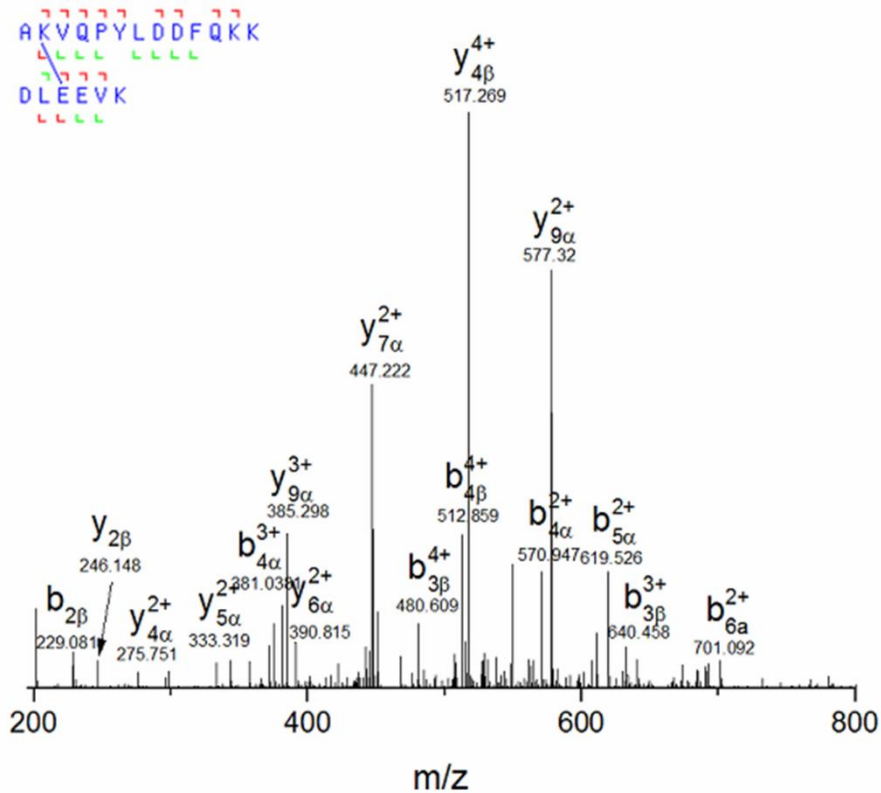

| K96-E91, m/z: 459.447, Charge state: 5 |          |         |         |          |
|----------------------------------------|----------|---------|---------|----------|
| fragment type                          | position | ion th  | peak    | delta mz |
| alpha common y standard plus1          | 6        | 780.389 | 780.379 | 0.01     |
| alpha common y standard plus2          | 10       | 641.328 | 641.311 | 0.017    |
| alpha common y standard plus2          | 11       | 690.862 | 690.748 | 0.114    |
| alpha common y standard plus2          | 4        | 275.672 | 275.751 | -0.079   |
| alpha common y standard plus2          | 5        | 333.185 | 333.319 | -0.134   |
| alpha common y standard plus2          | 6        | 390.699 | 390.815 | -0.117   |
| alpha common y standard plus2          | 7        | 447.241 | 447.222 | 0.019    |
| alpha common y standard plus2          | 9        | 577.299 | 577.32  | -0.022   |
| alpha common y standard plus3          | 7        | 298.496 | 298.506 | -0.01    |
| alpha common y standard plus3          | 9        | 385.202 | 385.298 | -0.096   |
| alpha xlink b standard plus2           | 3        | 506.788 | 507.025 | -0.237   |
| alpha xlink b standard plus2           | 4        | 570.817 | 570.947 | -0.13    |
| alpha xlink b standard plus2           | 5        | 619.344 | 619.526 | -0.182   |
| alpha xlink b standard plus2           | 6        | 700.875 | 701.092 | -0.217   |
| alpha xlink b standard plus3           | 11       | 673.674 | 673.623 | 0.051    |
| alpha xlink b standard plus3           | 4        | 380.881 | 381.038 | -0.157   |
| alpha xlink b standard plus3           | 6        | 467.586 | 467.757 | -0.171   |
| alpha xlink b standard plus3           | 8        | 543.623 | 543.803 | -0.18    |
| alpha xlink b standard plus3           | 9        | 581.965 | 582.35  | -0.385   |
| alpha xlink b standard plus4           | 12       | 537.531 | 537.666 | -0.135   |
| alpha xlink b standard plus4           | 2        | 229.131 | 229.081 | 0.05     |
| alpha xlink b standard plus4           | 9        | 436.726 | 437.083 | -0.357   |
| beta common b standard plus1           | 2        | 229.119 | 229.081 | 0.038    |
| beta common y standard plus1           | 2        | 246.182 | 246.148 | 0.034    |
| beta common y standard plus1           | 3        | 375.224 | 375.046 | 0.178    |
| beta xlink b standard plus3            | 3        | 640.336 | 640.458 | -0.122   |
| beta xlink b standard plus3            | 4        | 683.35  | 683.969 | -0.619   |
| beta xlink b standard plus4            | 3        | 480.504 | 480.609 | -0.106   |
| beta xlink b standard plus4            | 4        | 512.764 | 512.859 | -0.094   |
| beta xlink b standard plus4            | 5        | 537.531 | 537.666 | -0.135   |
| beta xlink y standard plus4            | 4        | 517.03  | 517.269 | -0.239   |
| beta xlink y standard plus4            | 5        | 545.301 | 545.448 | -0.147   |
| beta xlink y standard plus5            | 5        | 436.442 | 436.22  | 0.223    |

Figure S4.2. The MS/MS spectrum and the list of fragment ions of cross-linked peptide AKVQPYLDDFQKK-DLEEVK in human HDL

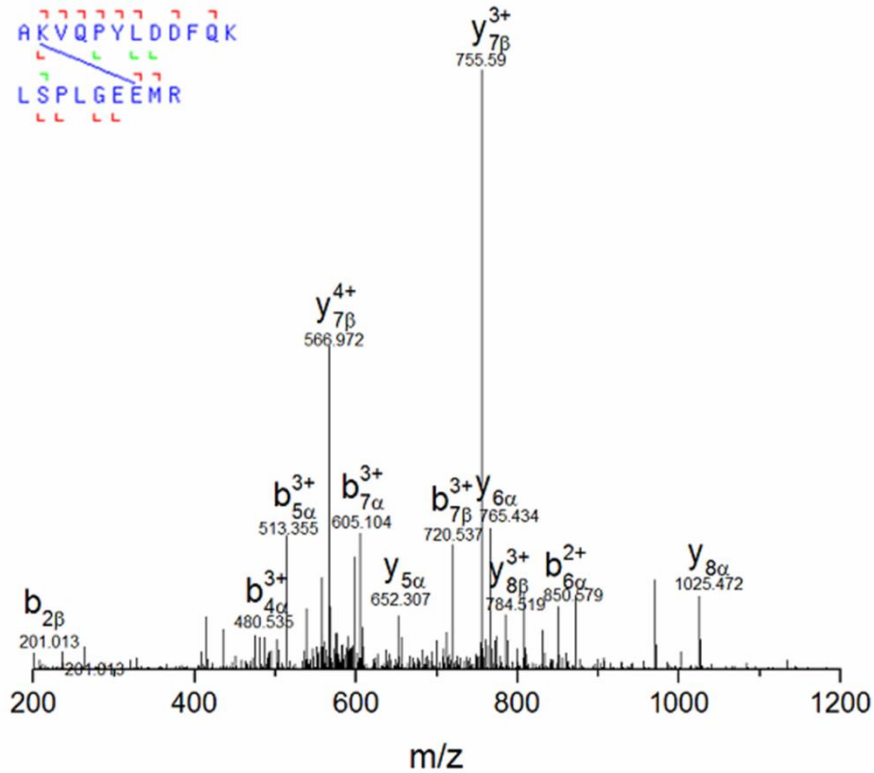

| K96-E147, m/z: 616.82, Charge state: 4 |          |          |          |          |
|----------------------------------------|----------|----------|----------|----------|
| fragment type                          | position | ion th   | peak     | delta mz |
| alpha_common_y_standard_plus1          | 5        | 652.294  | 652.307  | -0.013   |
| alpha_common_y_standard_plus1          | 6        | 765.378  | 765.434  | -0.056   |
| alpha_common_y_standard_plus1          | 8        | 1025.494 | 1025.472 | 0.023    |
| alpha_xlink_b_standard_plus2           | 2        | 606.824  | 607.084  | -0.26    |
| alpha_xlink_b_standard_plus2           | 3        | 656.359  | 656.495  | -0.136   |
| alpha_xlink_b_standard_plus2           | 4        | 720.388  | 720.537  | -0.149   |
| alpha_xlink_b_standard_plus2           | 6        | 850.446  | 850.579  | -0.133   |
| alpha_xlink_b_standard_plus3           | 11       | 773.388  | 773.668  | -0.28    |
| alpha_xlink_b_standard_plus3           | 4        | 480.595  | 480.535  | 0.06     |
| alpha_xlink_b_standard_plus3           | 5        | 512.945  | 513.355  | -0.409   |
| alpha_xlink_b_standard_plus3           | 6        | 567.3    | 567.776  | -0.476   |
| alpha_xlink_b_standard_plus3           | 7        | 604.995  | 605.104  | -0.11    |
| alpha_xlink_b_standard_plus3           | 9        | 681.679  | 681.941  | -0.262   |
| alpha_xlink_y_standard_plus3           | 11       | 798.411  | 798.984  | -0.573   |
| alpha_xlink_y_standard_plus4           | 11       | 599.06   | 599.099  | -0.039   |
| beta_common_b_standard_plus1           | 2        | 201.124  | 201.013  | 0.111    |
| beta_xlink_b_standard_plus3            | 7        | 720.373  | 720.537  | -0.164   |
| beta_xlink_b_standard_plus4            | 8        | 573.292  | 573.574  | -0.283   |
| beta_xlink_y_standard_plus3            | 4        | 666.332  | 666.287  | 0.044    |
| beta_xlink_y_standard_plus3            | 7        | 755.385  | 755.59   | -0.205   |
| beta_xlink_y_standard_plus3            | 8        | 784.395  | 784.519  | -0.123   |
| beta_xlink_y_standard_plus4            | 5        | 514.256  | 514.503  | -0.247   |
| beta_xlink_y_standard_plus4            | 7        | 566.791  | 566.972  | -0.182   |
| beta_xlink_y_standard_plus4            | 8        | 588.549  | 588.894  | -0.345   |

Figure S4.3. The MS/MS spectrum and the list of fragment ions of cross-linked peptide AKVQPYLDDFQK-LSPLGEEMR in human HDL

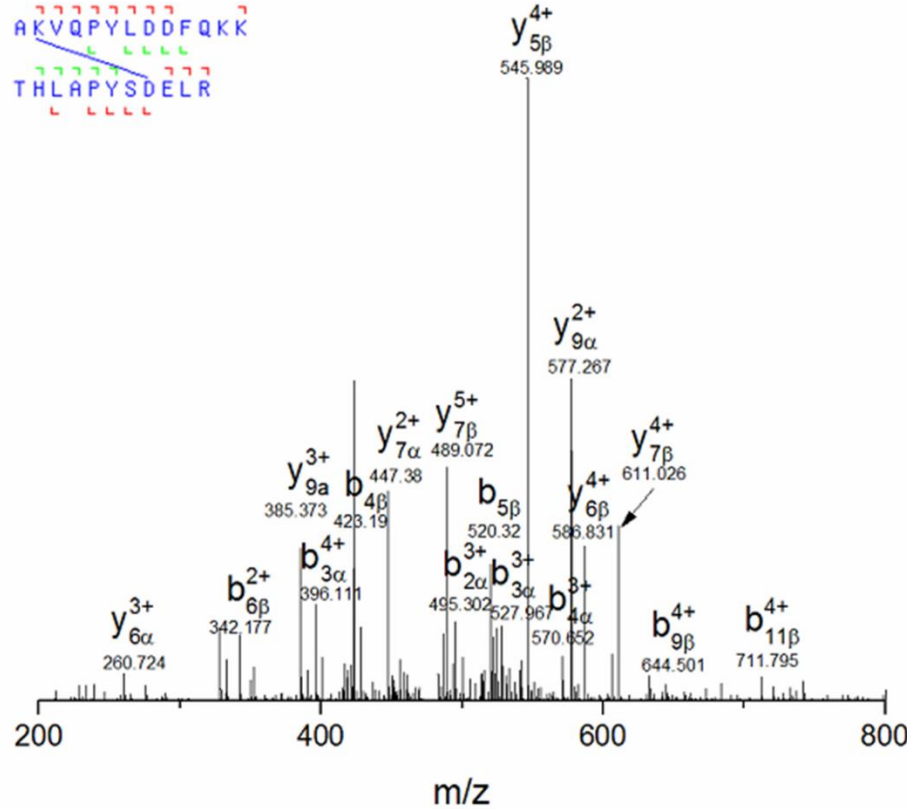

| K96-D168, m/z: 447.92, Charge state: 6 |          |         |         |          |
|----------------------------------------|----------|---------|---------|----------|
| fragment type                          | Position | ion th  | peak    | delta mz |
| alpha_common_y_standard_plus2          | 4        | 275.672 | 275.666 | 0.006    |
| alpha_common_y_standard_plus2          | 5        | 333.185 | 333.334 | -0.149   |
| alpha_common_y_standard_plus2          | 7        | 447.241 | 447.38  | -0.14    |
| alpha_common_y_standard_plus2          | 9        | 577.299 | 577.267 | 0.032    |
| alpha_common_y_standard_plus3          | 6        | 260.802 | 260.724 | 0.077    |
| alpha_common_y_standard_plus3          | 9        | 385.202 | 385.373 | -0.172   |
| alpha_xlink_b_standard_plus3           | 2        | 494.929 | 495.302 | -0.374   |
| alpha_xlink_b_standard_plus3           | 3        | 527.952 | 527.967 | -0.016   |
| alpha_xlink_b_standard_plus3           | 4        | 570.638 | 570.652 | -0.014   |
| alpha_xlink_b_standard_plus3           | 5        | 602.989 | 603.083 | -0.094   |
| alpha_xlink_b_standard_plus3           | 8        | 733.38  | 733.208 | 0.172    |
| alpha_xlink_b_standard_plus4           | 13       | 711.873 | 711.795 | 0.078    |
| alpha_xlink_b_standard_plus4           | 3        | 396.216 | 396.111 | 0.104    |
| alpha_xlink_b_standard_plus4           | 4        | 428.23  | 428.266 | -0.036   |
| alpha_xlink_b_standard_plus4           | 6        | 493.259 | 493.421 | -0.162   |
| alpha_xlink_b_standard_plus4           | 7        | 521.53  | 521.273 | 0.257    |
| alpha_xlink_b_standard_plus4           | 8        | 550.287 | 550.773 | -0.486   |
| alpha_xlink_b_standard_plus4           | 9        | 579.044 | 579.557 | -0.513   |
| beta_common_b_standard_plus1           | 2        | 239.114 | 239.221 | -0.107   |
| beta_common_b_standard_plus1           | 3        | 352.198 | 352.194 | 0.005    |
| beta_common_b_standard_plus1           | 4        | 423.236 | 423.19  | 0.045    |
| beta_common_b_standard_plus1           | 5        | 520.288 | 520.32  | -0.032   |
| beta_common_b_standard_plus2           | 6        | 342.18  | 342.177 | 0.003    |
| beta_xlink_b_standard_plus4            | 10       | 672.848 | 673.339 | -0.492   |
| beta_xlink_b_standard_plus4            | 11       | 711.873 | 711.795 | 0.078    |
| beta_xlink_b_standard_plus4            | 9        | 644.577 | 644.501 | 0.075    |
| beta_xlink_y_standard_plus4            | 4        | 524.032 | 524.359 | -0.327   |
| beta_xlink_y_standard_plus4            | 5        | 545.79  | 545.989 | -0.199   |
| beta_xlink_y_standard_plus4            | 6        | 586.555 | 586.831 | -0.275   |
| beta_xlink_y_standard_plus4            | 7        | 610.819 | 611.026 | -0.208   |
| beta_xlink_y_standard_plus5            | 4        | 419.427 | 419.412 | 0.015    |
| beta_xlink_y_standard_plus5            | 7        | 488.857 | 489.072 | -0.215   |
| beta_xlink_y_standard_plus5            | 9        | 525.681 | 525.543 | 0.137    |

Figure S4.4. The MS/MS spectrum and the list of fragment ions of cross-linked peptide AKVQPYLDDFQK-THLAPYSDELR in human HDL

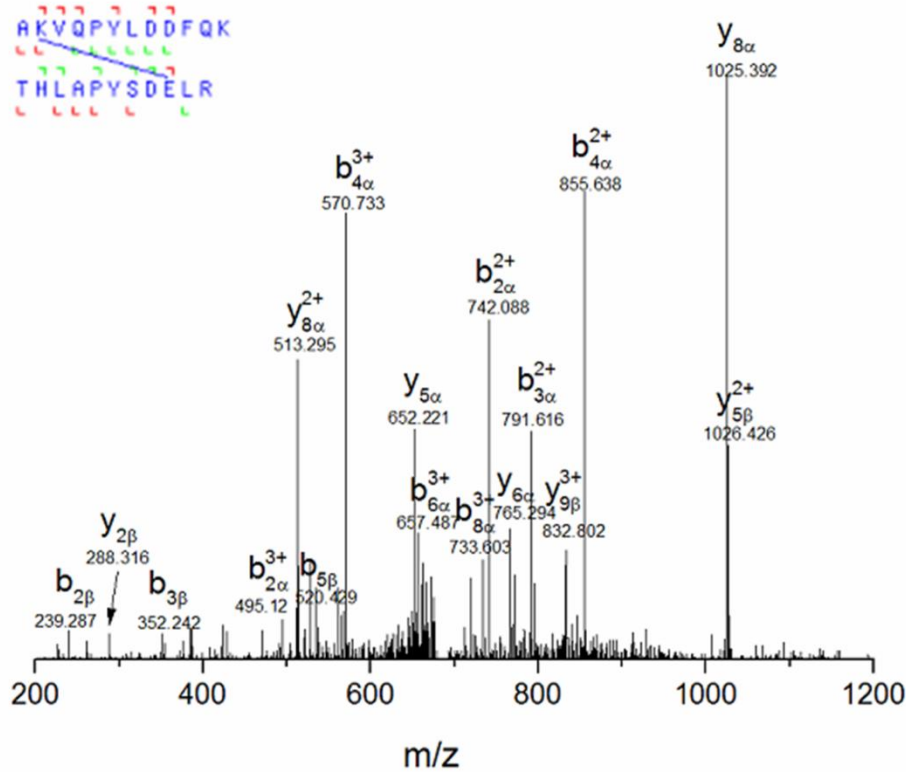

| K96-E169, m/z: 684.351, Charge state: 4 |          |          |          |          |
|-----------------------------------------|----------|----------|----------|----------|
| fragment type                           | position | ion th   | peak     | delta mz |
| alpha common y standard plus1           | 4        | 537.267  | 537.337  | -0.07    |
| alpha common y standard plus1           | 5        | 652.294  | 652.221  | 0.074    |
| alpha common y standard plus1           | 6        | 765.378  | 765.294  | 0.084    |
| alpha common y standard plus1           | 7        | 928.442  | 928.469  | -0.028   |
| alpha common y standard plus1           | 8        | 1025.494 | 1025.392 | 0.103    |
| alpha common y standard plus2           | 8        | 513.251  | 513.295  | -0.044   |
| alpha common y standard plus2           | 9        | 577.28   | 577.4    | -0.12    |
| alpha xlink b standard plus2            | 2        | 741.889  | 742.088  | -0.199   |
| alpha xlink b standard plus2            | 3        | 791.423  | 791.616  | -0.192   |
| alpha xlink b standard plus2            | 4        | 855.453  | 855.638  | -0.186   |
| alpha xlink b standard plus3            | 2        | 494.929  | 495.12   | -0.191   |
| alpha xlink b standard plus3            | 3        | 527.952  | 528.102  | -0.151   |
| alpha xlink b standard plus3            | 4        | 570.638  | 570.733  | -0.095   |
| alpha xlink b standard plus3            | 6        | 657.343  | 657.487  | -0.144   |
| alpha xlink b standard plus3            | 8        | 733.38   | 733.603  | -0.223   |
| alpha xlink b standard plus3            | 9        | 771.722  | 771.621  | 0.101    |
| alpha xlink y standard plus3            | 12       | 912.133  | 912.48   | -0.347   |
| alpha xlink y standard plus4            | 11       | 666.593  | 666.519  | 0.074    |
| beta common b standard plus1            | 2        | 239.114  | 239.287  | -0.172   |
| beta common b standard plus1            | 3        | 352.198  | 352.242  | -0.044   |
| beta common b standard plus1            | 5        | 520.288  | 520.429  | -0.14    |
| beta common b standard plus1            | 7        | 770.384  | 770.225  | 0.159    |
| beta common b standard plus1            | 8        | 885.411  | 885.333  | 0.078    |
| beta common y standard plus1            | 2        | 288.204  | 288.316  | -0.112   |
| beta xlink b standard plus3             | 9        | 816.401  | 816.931  | -0.53    |
| beta xlink y standard plus2             | 5        | 1026.524 | 1026.426 | 0.098    |
| beta xlink y standard plus3             | 11       | 912.133  | 912.48   | -0.347   |
| beta xlink y standard plus3             | 7        | 771.391  | 771.621  | -0.231   |
| beta xlink y standard plus3             | 8        | 795.07   | 795.332  | -0.262   |
| beta xlink y standard plus3             | 9        | 832.764  | 832.802  | -0.038   |
| beta xlink y standard plus4             | 5        | 513.766  | 513.985  | -0.219   |
| beta xlink y standard plus4             | 9        | 624.825  | 625.272  | -0.447   |

Figure S4.5. The MS/MS spectrum and the list of fragment ions of cross-linked peptide AKVQPYLDDFQK-THLAPYSDEL R in human HDL

Cross-linking and MS/MS reveals multiple registries in APOA1

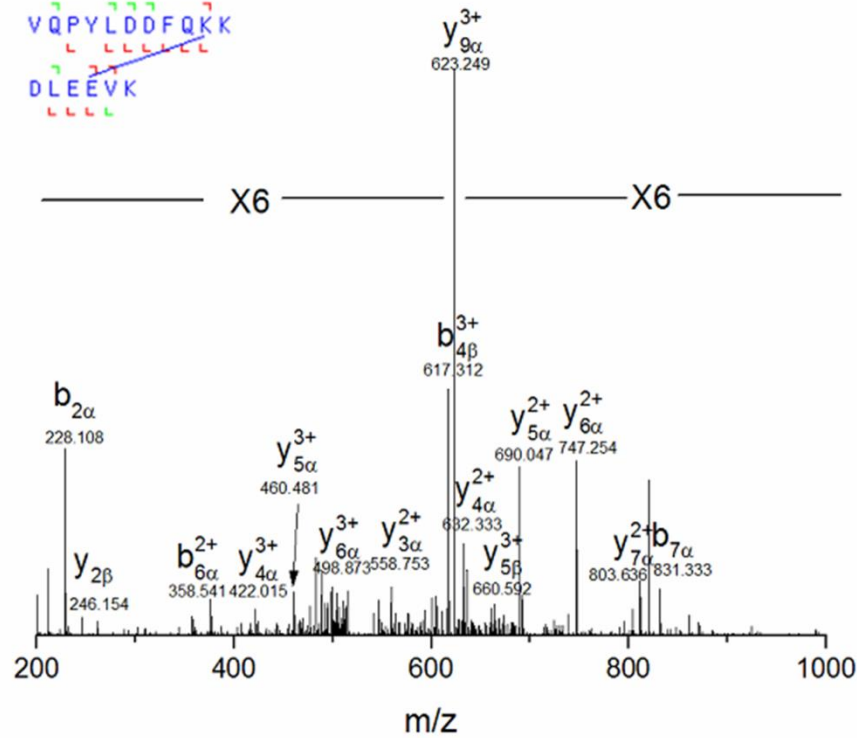

K106-E92, m/z: 524.276, Charge state: 4

| fragment type                 | position | ion th  | peak            | delta mz     |
|-------------------------------|----------|---------|-----------------|--------------|
| alpha_common_b_standard_plus1 | 2        | 228.135 | 228.108         | 0.027        |
| alpha_common_b_standard_plus1 | 7        | 831.389 | 831.333         | 0.056        |
| alpha_common_b_standard_plus2 | 6        | 358.685 | 358.541         | 0.144        |
| alpha_common_b_standard_plus3 | 5        | 201.117 | 201.098         | 0.019        |
| alpha_xlink_b_standard_plus4  | 10       | 487.748 | 487.784         | -0.036       |
| alpha_xlink_y_standard_plus2  | 2        | 494.788 | 494.744         | 0.044        |
| alpha_xlink_y_standard_plus2  | 3        | 558.817 | 558.753,559.450 | 0.064,-0.633 |
| alpha_xlink_y_standard_plus2  | 4        | 632.351 | 632.333,633.041 | 0.018,-0.689 |
| alpha_xlink_y_standard_plus2  | 5        | 689.865 | 690.047         | -0.183       |
| alpha_xlink_y_standard_plus2  | 6        | 747.378 | 747.254,747.957 | 0.125,-0.579 |
| alpha_xlink_y_standard_plus2  | 7        | 803.92  | 803.636,804.474 | 0.285,-0.554 |
| alpha_xlink_y_standard_plus3  | 4        | 421.904 | 422.015         | -0.111       |
| alpha_xlink_y_standard_plus3  | 5        | 460.246 | 460.481         | -0.235       |
| alpha_xlink_y_standard_plus3  | 6        | 498.588 | 498.873         | -0.285       |
| alpha_xlink_y_standard_plus3  | 9        | 622.988 | 623.249         | -0.261       |
| beta_common_b_standard_plus1  | 2        | 229.119 | 229.119         | 0            |
| beta_common_y_standard_plus1  | 2        | 246.182 | 246.154         | 0.027        |
| beta_xlink_b_standard_plus3   | 4        | 616.973 | 617.312         | -0.34        |
| beta_xlink_b_standard_plus4   | 5        | 487.748 | 487.784         | -0.036       |
| beta_xlink_y_standard_plus3   | 3        | 579.646 | 579.715         | -0.069       |
| beta_xlink_y_standard_plus3   | 4        | 622.66  | 622.516,623.249 | 0.144,-0.589 |
| beta_xlink_y_standard_plus3   | 5        | 660.355 | 660.592         | -0.237       |
| beta_xlink_y_standard_plus4   | 5        | 495.518 | 495.643         | -0.125       |

Figure S4.6. The MS/MS spectrum and the list of fragment ions of cross-linked peptide VQPYLDDFQKK-DLEEVK in human HDL

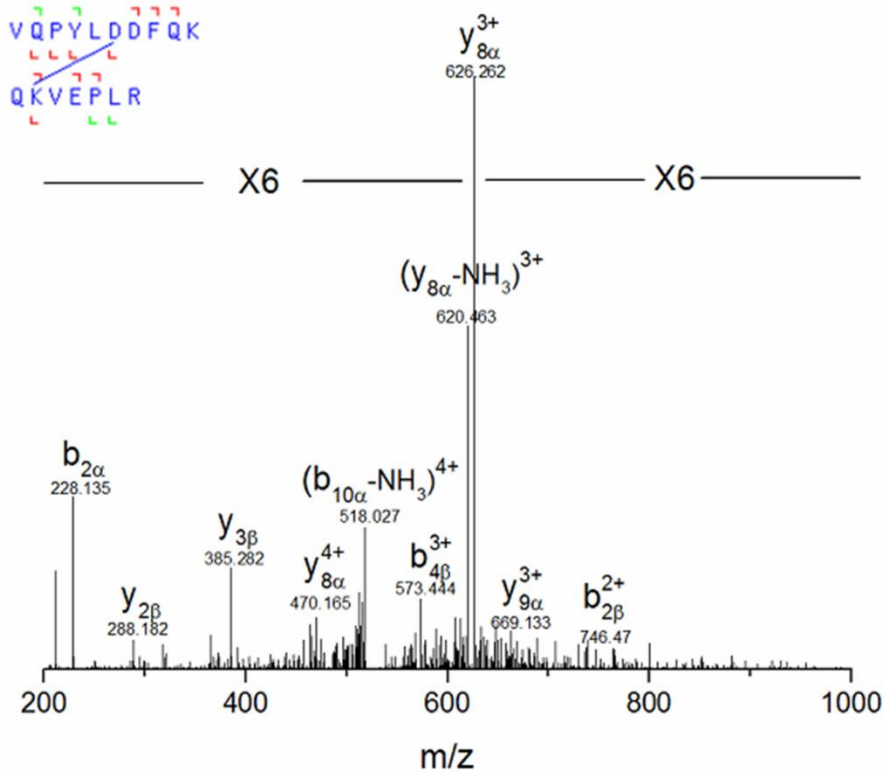

K118-D102, m/z: 526.538, Charge state: 4

| fragment type                 | position | ion th  | peak    | delta mz |
|-------------------------------|----------|---------|---------|----------|
| alpha_common_b_standard_plus1 | 2        | 228.135 | 228.018 | 0.117    |
| alpha_common_b_standard_plus1 | 4        | 488.251 | 488.347 | -0.096   |
| alpha_xlink_b_-NH3_plus4      | 10       | 517.778 | 518.027 | -0.25    |
| alpha_xlink_b_standard_plus3  | 7        | 561.302 | 561.827 | -0.525   |
| alpha_xlink_b_standard_plus4  | 8        | 457.996 | 457.814 | 0.182    |
| alpha_xlink_b_standard_plus4  | 9        | 490.01  | 490.55  | -0.54    |
| alpha_xlink_y_-NH3_plus3      | 8        | 620.329 | 620.463 | -0.134   |
| alpha_xlink_y_standard_plus3  | 5        | 501.604 | 501.733 | -0.129   |
| alpha_xlink_y_standard_plus3  | 7        | 593.653 | 593.496 | 0.157    |
| alpha_xlink_y_standard_plus3  | 8        | 626.004 | 626.262 | -0.258   |
| alpha_xlink_y_standard_plus3  | 9        | 668.69  | 669.133 | -0.442   |
| alpha_xlink_y_standard_plus4  | 8        | 469.755 | 470.165 | -0.41    |
| alpha_xlink_y_standard_plus4  | 9        | 501.77  | 501.733 | 0.037    |
| beta_common_y_standard_plus1  | 2        | 288.204 | 288.182 | 0.022    |
| beta_common_y_standard_plus1  | 3        | 385.256 | 385.282 | -0.026   |
| beta_xlink_b_standard_plus2   | 2        | 745.886 | 746.47  | -0.584   |
| beta_xlink_b_standard_plus3   | 4        | 573.63  | 573.444 | 0.186    |
| beta_xlink_b_standard_plus3   | 5        | 605.981 | 606.399 | -0.418   |
| beta_xlink_y_standard_plus3   | 6        | 659.027 | 659.13  | -0.103   |

Figure S4.7. The MS/MS spectrum and the list of fragment ions of cross-linked peptide VQPYLDDFQK-QKVEPLR in human HDL



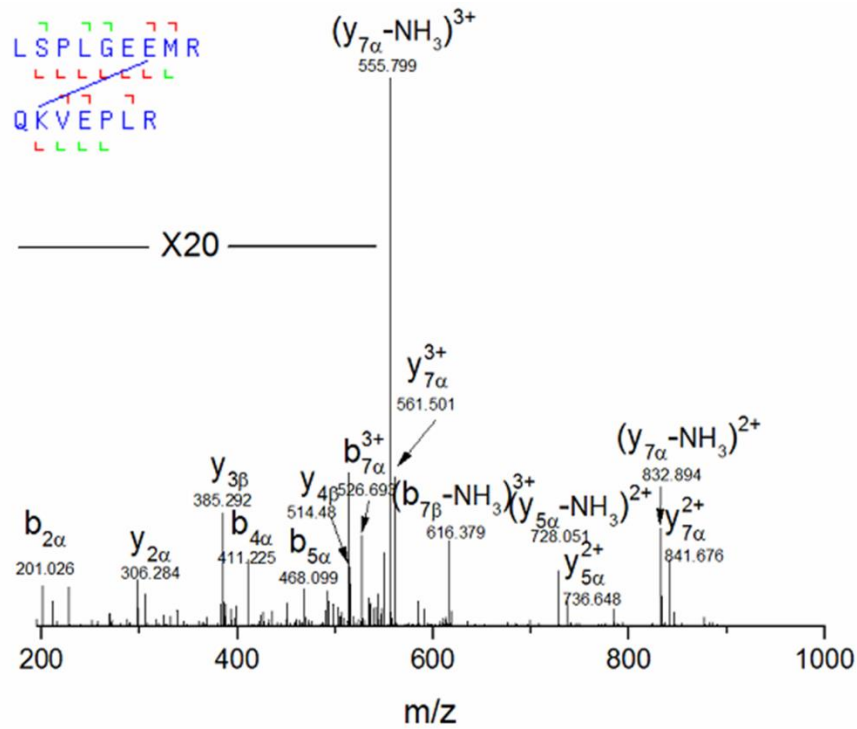

| K118-E147, m/z: 628.013 Charge state: 3 |          |         |                 |               |
|-----------------------------------------|----------|---------|-----------------|---------------|
| fragment type                           | position | ion th  | peak            | delta mz      |
| alpha_common_b_standard_plus1           | 2        | 201.124 | 201.026         | 0.098         |
| alpha_common_b_standard_plus1           | 4        | 411.261 | 411.225         | 0.035         |
| alpha_common_b_standard_plus1           | 5        | 468.282 | 468.099         | 0.184         |
| alpha_common_y_standard_plus1           | 2        | 306.16  | 306.284         | -0.124        |
| alpha_xlink_b_standard_plus2            | 7        | 788.939 | 789.432         | -0.493        |
| alpha_xlink_b_standard_plus2            | 8        | 854.459 | 854.664         | -0.205        |
| alpha_xlink_b_standard_plus3            | 7        | 526.295 | 526.693         | -0.398        |
| alpha_xlink_y_-NH3_plus2                | 5        | 727.875 | 728.051         | -0.176        |
| alpha_xlink_y_-NH3_plus2                | 7        | 832.944 | 832.894,833.559 | 0.049,-0.615  |
| alpha_xlink_y_-NH3_plus3                | 7        | 555.632 | 555.799         | -0.167        |
| alpha_xlink_y_standard_plus2            | 3        | 643.356 | 643.440,644.070 | -0.084,-0.714 |
| alpha_xlink_y_standard_plus2            | 4        | 707.878 | 707.867         | 0.01          |
| alpha_xlink_y_standard_plus2            | 5        | 736.388 | 736.648         | -0.26         |
| alpha_xlink_y_standard_plus2            | 6        | 792.931 | 793.091         | -0.16         |
| alpha_xlink_y_standard_plus2            | 7        | 841.457 | 841.676         | -0.219        |
| alpha_xlink_y_standard_plus2            | 8        | 884.973 | 885.309         | -0.336        |
| alpha_xlink_y_standard_plus3            | 7        | 561.307 | 561.501         | -0.193        |
| alpha_xlink_y_standard_plus3            | 8        | 590.318 | 590.581         | -0.263        |
| beta_common_y_standard_plus1            | 3        | 385.256 | 385.292         | -0.036        |
| beta_common_y_standard_plus1            | 4        | 514.299 | 514.48          | -0.181        |
| beta_common_y_standard_plus1            | 5        | 613.367 | 613.431         | -0.064        |
| beta_xlink_b_-NH3_plus3                 | 7        | 616.334 | 616.379         | -0.045        |
| beta_xlink_b_standard_plus2             | 3        | 684.869 | 685.26          | -0.391        |
| beta_xlink_b_standard_plus2             | 4        | 749.391 | 749.656         | -0.265        |
| beta_xlink_b_standard_plus2             | 6        | 854.459 | 854.664         | -0.205        |
| beta_xlink_y_standard_plus2             | 6        | 877.486 | 877.506         | -0.021        |

Figure S4.8. The MS/MS spectrum and the list of fragment ions of cross-linked peptide LSPLGEEMR-QKVEPLR in human HDL

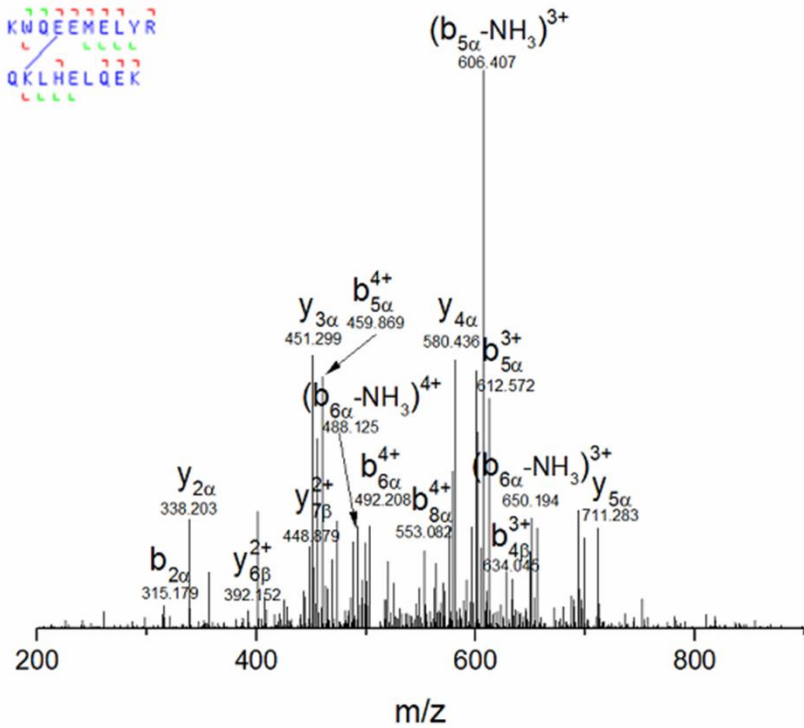

K133-E110, m/z: 509.865, Charge state: 5

| fragment type                 | position | ion th  | peak            | delta mz     |
|-------------------------------|----------|---------|-----------------|--------------|
| alpha common b standard plus1 | 2        | 315.182 | 315.179         | 0.003        |
| alpha common b standard plus1 | 3        | 443.241 | 443.182         | 0.059        |
| alpha common y -NH3 plus1     | 5        | 694.323 | 694.36          | -0.037       |
| alpha common y standard plus1 | 2        | 338.183 | 338.203         | -0.021       |
| alpha common y standard plus1 | 3        | 451.267 | 451.299         | -0.032       |
| alpha common y standard plus1 | 4        | 580.309 | 580.436         | -0.127       |
| alpha common y standard plus1 | 5        | 711.35  | 711.283         | 0.067        |
| alpha xlink b -NH3 plus3      | 5        | 606.645 | 606.407,607.029 | 0.238,-0.384 |
| alpha xlink b -NH3 plus3      | 6        | 650.325 | 650.194,650.943 | 0.131,-0.618 |
| alpha xlink b -NH3 plus4      | 6        | 487.996 | 488.125         | -0.129       |
| alpha xlink b standard plus3  | 4        | 569.306 | 569.786         | -0.48        |
| alpha xlink b standard plus3  | 5        | 612.32  | 612.572         | -0.252       |
| alpha xlink b standard plus3  | 6        | 656     | 656.364         | -0.363       |
| alpha xlink b standard plus3  | 7        | 699.015 | 699.343         | -0.328       |
| alpha xlink b standard plus4  | 10       | 632.575 | 632.645         | -0.07        |
| alpha xlink b standard plus4  | 4        | 427.232 | 427.523         | -0.291       |
| alpha xlink b standard plus4  | 5        | 459.492 | 459.869         | -0.377       |
| alpha xlink b standard plus4  | 6        | 492.252 | 492.208         | 0.045        |
| alpha xlink b standard plus4  | 8        | 552.784 | 553.082         | -0.298       |
| alpha xlink y standard plus4  | 9        | 605.054 | 604.897,605.513 | 0.157,-0.459 |
| alpha xlink y standard plus5  | 9        | 484.245 | 484.444         | -0.199       |
| beta common y -NH3 plus2      | 5        | 315.161 | 315.179         | -0.018       |
| beta common y standard plus1  | 5        | 646.341 | 646.372         | -0.031       |
| beta common y standard plus2  | 6        | 392.204 | 392.152         | 0.052        |
| beta common y standard plus2  | 7        | 448.746 | 448.879         | -0.133       |
| beta xlink b standard plus3   | 4        | 633.99  | 634.045         | -0.056       |
| beta xlink b standard plus4   | 7        | 568.291 | 568.677         | -0.386       |
| beta xlink b standard plus4   | 8        | 600.551 | 600.811         | -0.26        |
| beta xlink b standard plus4   | 9        | 632.575 | 632.645         | -0.07        |
| beta xlink b standard plus5   | 8        | 480.643 | 481.049         | -0.407       |
| beta xlink y standard plus4   | 8        | 605.063 | 604.897,605.513 | 0.166,-0.450 |
| beta xlink y standard plus5   | 8        | 484.252 | 484.444         | -0.192       |

Figure S4.9. The MS/MS spectrum and the list of fragment ions of cross-linked peptide KWQEEMLYR-QKLHELQEK in human HDL

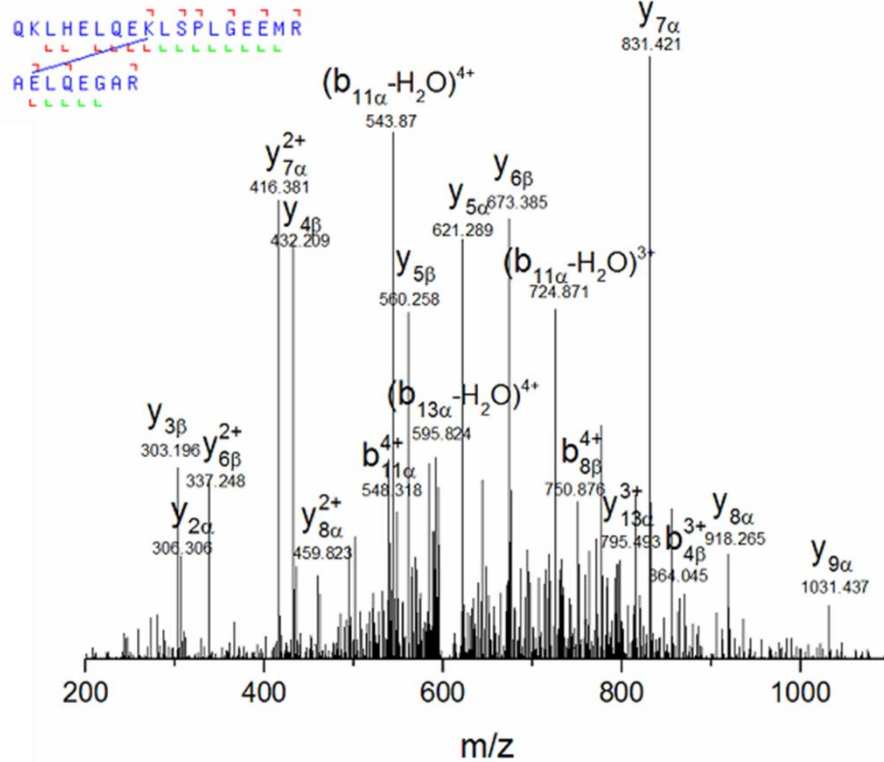

K140-E125, m/z:604.721, Charge state: 5

| fragment type                 | position | ion th  | peak            | delta mz     |
|-------------------------------|----------|---------|-----------------|--------------|
| alpha common y standard plus1 | 2        | 306.16  | 306.306         | -0.146       |
| alpha common y standard plus1 | 3        | 435.203 | 435.32          | -0.117       |
| alpha common y standard plus1 | 4        | 564.245 | 564.302         | -0.057       |
| alpha common y standard plus1 | 5        | 621.267 | 621.289         | -0.022       |
| alpha common y standard plus1 | 6        | 734.351 | 734.303         | 0.047        |
| alpha common y standard plus1 | 7        | 831.403 | 831.421         | -0.017       |
| alpha common y standard plus1 | 8        | 918.435 | 918.265         | 0.17         |
| alpha common y standard plus1 | 9        | 1031.52 | 1031.437        | 0.083        |
| alpha common y standard plus2 | 7        | 416.206 | 416.381         | -0.175       |
| alpha common y standard plus2 | 8        | 459.722 | 459.823         | -0.101       |
| alpha xlink b -H2O plus3      | 11       | 724.391 | 724.871         | -0.48        |
| alpha xlink b -H2O plus4      | 11       | 543.545 | 543.87          | -0.325       |
| alpha xlink b -H2O plus4      | 13       | 596.079 | 595.824         | 0.255        |
| alpha xlink b standard plus3  | 11       | 730.395 | 730.871         | -0.476       |
| alpha xlink b standard plus3  | 12       | 762.745 | 763.012         | -0.267       |
| alpha xlink b standard plus3  | 14       | 819.447 | 819.544         | -0.097       |
| alpha xlink b standard plus3  | 9        | 663.689 | 663.798         | -0.109       |
| alpha xlink b standard plus4  | 11       | 548.048 | 548.318         | -0.271       |
| alpha xlink b standard plus4  | 18       | 751.144 | 750.876,751.690 | 0.268,-0.545 |
| alpha xlink b standard plus5  | 16       | 543.689 | 543.87          | -0.182       |
| alpha xlink y standard plus3  | 10       | 672.018 | 672.504         | -0.485       |
| alpha xlink y standard plus3  | 11       | 715.032 | 715.429         | -0.397       |
| alpha xlink y standard plus3  | 13       | 795.413 | 795.493         | -0.08        |
| alpha xlink y standard plus4  | 12       | 568.541 | 568.397         | 0.144        |
| alpha xlink y standard plus4  | 15       | 663.337 | 663.798         | -0.461       |
| alpha xlink y standard plus4  | 16       | 691.608 | 692.11          | -0.502       |
| beta common y standard plus1  | 3        | 303.178 | 303.196         | -0.018       |
| beta common y standard plus1  | 4        | 432.221 | 432.209         | 0.012        |
| beta common y standard plus1  | 5        | 560.279 | 560.258         | 0.021        |
| beta common y standard plus1  | 6        | 673.363 | 673.385         | -0.022       |
| beta common y standard plus2  | 6        | 337.186 | 337.248         | -0.062       |
| beta xlink b standard plus3   | 2        | 783.075 | 783.151         | -0.077       |
| beta xlink b standard plus3   | 4        | 863.455 | 864.045         | -0.589       |
| beta xlink b standard plus4   | 2        | 587.558 | 587.824         | -0.266       |
| beta xlink b standard plus4   | 4        | 647.844 | 647.833         | 0.01         |
| beta xlink b standard plus4   | 8        | 751.144 | 750.876,751.690 | 0.268,-0.545 |
| beta xlink y standard plus5   | 7        | 590.512 | 590.921         | -0.41        |

Figure S4.10. The MS/MS spectrum and the list of fragment ions of cross-linked peptide QKLHELQEKLSPLGEEMR-AELQEGAR in human HDL
